## **Title: A frequency-dependent mobilization of heterogeneous pools of synaptic vesicles shapes presynaptic plasticity**

**Frédéric Doussau<sup>1</sup>, Hartmut Schmidt<sup>2</sup>, Kevin Dorgans<sup>1</sup>, Antoine M. Valera<sup>1,3</sup>, Bernard Poulain<sup>1</sup>, and Philippe Isope<sup>1</sup>.**

<sup>1</sup>Institut des Neurosciences Cellulaires et Intégratives, CNRS UPR 3212, Université de Strasbourg, 67084 Strasbourg, France

<sup>2</sup>Carl-Ludwig Institute for Physiology, University of Leipzig, 04103 Leipzig, Germany

<sup>3</sup>Present Address: Department of Neuroscience, Physiology and Pharmacology, University College London, London WC1E 6BT

Corresponding author: Frédéric Doussau  
INCI, CNRS UPR 3212  
5, rue Blaise Pascal  
67084 Strasbourg, France  
E-mail: [doussau@inci-cnrs.unistra.fr](mailto:doussau@inci-cnrs.unistra.fr)

Number of pages: 30

Number of figures: 8

The authors declare no competing financial interests

### **AUTHOR CONTRIBUTIONS**

FD and PI designed the study. FD and KD performed electrophysiological experiments. HS performed modeling of neurotransmitter release. BP and AMV provided theoretical and analytical tools for analyses. FD analyzed data. FD and PI wrote the manuscript.

### **ACKNOWLEDGMENTS**

This work was supported by the Centre National pour la Recherche Scientifique, the Université de Strasbourg, the Agence Nationale pour la Recherche Grant (ANR-2010-JCJC-1403-1 MicroCer) and by the Fondation pour la Recherche Médicale to PI (# DEQ20140329514). We thank the TIGER project funded by INTERREG IV Rhin Supérieur program and European Funds for Regional Development (FEDER, # A31). This work was also supported by a DFG grant to HS (SCHM1838). AMV and KD were funded by a fellowship from the Ministère de la Recherche. AMV was also funded by a fellowship from the Fondation pour la Recherche Médicale.

We thank Sophie Reibel-Foisset and the animal facility Chronobiotron (UMS 3415 CNRS and Strasbourg University) for technical assistance. We thank Joanna Lignot (Munro Language Services) for proofreading.

# A frequency-dependent mobilization of heterogeneous pools of synaptic vesicles shapes presynaptic plasticity

*F. Doussau, H. Schmidt, K. Dorgans, A. M. Valera, B. Poulain and P. Isope.*

## ABSTRACT

The segregation of the readily releasable pool of synaptic vesicles (RRP) in sub-pool which are differentially poised for exocytosis shapes short-term plasticity at depressing synapses. Here, we used in vitro recording and modeling of synaptic activity at the facilitating mice cerebellar granule cell to Purkinje cell synapse to demonstrate the existence of two sub-pools of vesicles in the RRP that can be differentially recruited upon fast changes in the stimulation frequency. We show that upon low-frequency stimulation, a population of fully-releasable vesicles is silenced, leading to full blockage of synaptic transmission. A second population of vesicles, reluctant to release by simple stimuli, is recruited in a millisecond time scale by high-frequency stimulation to support an ultrafast recovery of neurotransmitter release after low-frequency depression. The frequency-dependent mobilization or silencing of sub-pools of vesicles in granule cell terminals should play a major role in the filtering of sensorimotor information in the cerebellum.

## INTRODUCTION

In neural networks, transfer of information largely relies on the ability of presynaptic terminals to transduce information encoded by changes in action potentials (APs) firing rate into changes in the release of neurotransmitters. During trains of APs, the immediate tuning of synaptic efficacy is determined by the combination of multiple parameters including AP frequency, past firing activities, number of release-competent synaptic vesicles (SVs), also referred as the readily-releasable pool (RRP), probability of

28 release ( $p_r$ ), or the number of release sites ( $N$ ). To date, the deciphering of cellular  
29 mechanisms underlying synaptic efficacy is challenged by a non-unified view of the  
30 identity of SVs belonging to the RRP (Neher, 2015). Depending on studies, the RRP  
31 may correspond to a large population of docked SVs releasable by hyperosmotic  
32 stimulation or at the opposite is restricted to SVs releasable by a single AP (Moulder and  
33 Mennerick, 2005; Pan and Zucker, 2009; Neher, 2015). Besides, there is increasing  
34 evidence showing that the RRP is constituted with heterogeneous population of SVs  
35 differentially poised for exocytosis and sequentially recruited before the fusion step. In  
36 the calyx of Held, the RRP can be separated into a fast-releasing pool (FRP) and a  
37 slowly releasing one (SRP) (Sakaba and Neher, 2001; Sakaba, 2006; Schneggenburger  
38 et al., 2012) and during a train of APs, SRP are first converted to the FRP and then  
39 mature to a superpriming step before acquiring a high release rate (Lee et al., 2012,  
40 2013). In the cerebellar cortex, at GC-molecular layer interneuron (MLI), a segregation of  
41 the RRP in two pools mobilized in a two-step process has also been described while  
42 with faster kinetics for the transition between the two steps (Ishiyama et al., 2014; Miki et  
43 al., 2016). Finally, these studies draw a model in which synaptic plasticity during high-  
44 frequency trains is shaped by the kinetics of mobilization of sub-pools of SVs in the RRP  
45 (Pan and Zucker, 2009; Miki et al., 2016). However, the way synapses manage these  
46 pools/steps upon a broad bandwidth of stimulation frequency are still unknown.

47 Counter intuitively, the size of the RRP does not predetermine the orientation of  
48 presynaptic plasticity during high-frequency train since the calyx of Held with a very large  
49 RRP (700 to 5000 SVs; Borst and Soria van Hove, 2012) immediately depress while  
50 GC to Purkinje cell (PC) synapses facilitates during tens of APs (Kreitzer and Regehr,  
51 2000; Valera et al., 2012; Schmidt et al., 2013), despite a RRP combining a small size  
52 (4-8 SVs, Xu-Friedman et al., 2001) with a relatively high  $p_r$  (Schmidt et al., 2013; Sims

53 and Hartell, 2005; Valera et al., 2012 - but see Atluri and Regehr, 1996). Using computer  
54 simulations associated with variance analysis of postsynaptic responses, we previously  
55 showed that this striking facilitation is the consequence of an increase in  $N$  occurring in  
56 milliseconds upon a  $\text{Ca}^{2+}$ -dependent process (Valera et al., 2012; Brachtendorf et al.,  
57 2015). Here, we investigated the cellular mechanisms underlying presynaptic plasticity  
58 at GC-PC synapses, not only during burst of activity but also upon fast changes in the  
59 stimulation frequency. We did reveal the existence of two pools of mature SVs with  
60 distinct releasable properties: the fully-releasable pool which can be released by a single  
61 AP and the reluctant pool available for fusion in a millisecond time scale upon high-  
62 frequency stimuli. Also, we showed that fully-releasable SVs can be specifically and  
63 almost completely silenced by low-frequency stimulation. The ultrafast recruitment of  
64 reluctant SVs underlies the large facilitation of glutamate release at high frequencies and  
65 the rapid recovery of a full capacity of glutamate release following the almost complete  
66 inactivation of fully-releasable SVs. We finally describe a model demonstrating how two  
67 pools of SVs can account for the low-frequency depression and the ultrafast recovery of  
68 glutamate release at high frequencies. These results support the idea that the  
69 presynaptic machinery of GC boutons acts as a dynamic filter of GC activities, and  
70 explain how a wide range of sensory inputs are computed within the cerebellar cortex.

71

## 72 **MATERIALS AND METHODS**

73 All experimental protocols are in accordance with European and French guidelines  
74 for animal experimentation and have been approved by the Bas-Rhin veterinary office,  
75 Strasbourg, France (authorization number A 67-311 to FD)

76 *Slice preparation.* Acute horizontal cerebellar slices were prepared from male  
77 C57Bl/6 mice aged 18-25 days. Mice were anesthetized by isoflurane inhalation and

78 decapitated. The cerebellum was dissected out in ice-cold ACSF bubbled with carbogen  
79 (95% O<sub>2</sub>, 5% CO<sub>2</sub>) and containing 120 mM NaCl, 3 mM KCl, 26 mM NaHCO<sub>3</sub>, 1.25 mM  
80 NaH<sub>2</sub>PO<sub>4</sub>, 2.5 mM CaCl<sub>2</sub>, 2 mM MgCl<sub>2</sub>, 10 mM glucose and 0.05 mM minocyclin. Slices  
81 were then prepared (Microm HM650V) in a ice-cold solution containing 93 mM *N*-Methyl-  
82 D-Glucamine, 2.5 mM KCl, 0.5 mM CaCl<sub>2</sub>, 10 mM MgSO<sub>4</sub>, 1.2 mM NaH<sub>2</sub>PO<sub>4</sub>, 30 mM  
83 NaHCO<sub>3</sub>, 20 mM HEPES, 3 mM Na-Pyruvate, 2mM Thiourea, 5 mM Na-ascorbate, 25  
84 mM D-Glucose and 1 mM Kynurenic acid (Zhao et al., 2011). Slices 300 μm thick were  
85 briefly soaked in a sucrose-based solution at 34°C bubbled with carbogen and containing  
86 230 mM sucrose, 2.5 mM KCl, 26 mM NaHCO<sub>3</sub>, 1.25 mM NaH<sub>2</sub>PO<sub>4</sub>, 25 mM glucose, 0.8  
87 mM CaCl<sub>2</sub> and 8 mM MgCl<sub>2</sub> before being maintained in bubbled ASCF medium (see  
88 above) at 34°C until their use for experiments.

89 *Electrophysiology.* After at least 1 h of recovery at 34°C, a slice was transferred to  
90 a recording chamber. In order to block inhibitory transmission, postsynaptic plasticities,  
91 GABA<sub>B</sub> and endocannabinoid signaling, slices were continuously perfused with bubbled  
92 ACSF containing blockers of GABA<sub>A</sub>, GABA<sub>B</sub>, NMDA, CB1 and mGluR1 receptors. To  
93 do so, the following antagonists were added: 100 μM picrotoxin, 10 μM CGP52432 (3-  
94 [[(3,4-Dichlorophenyl)-methyl]amino]propyl(diethoxymethyl)phosphinic acid), 100 μM D-  
95 AP5 (D-(-)-2-Amino-5-phosphonopentanoic acid) and 1 μM AM251 (1-(2,4-  
96 Dichlorophenyl)-5-(4-iodophenyl)-4-methyl-N-(piperidin-1-yl)-1H-pyrazole-3-  
97 carboxamide) and 2 μM JNJ16259685 ((3,4-Dihydro-2H-pyrano[2,3-b]quinolin-7-yl)-(cis-  
98 4-methoxycyclohexyl)-methanone). Recordings were made at 34°C in PCs located in the  
99 vermis. PCs were visualized using infrared contrast optics on an Olympus BX51WI  
100 upright microscope. Whole-cell patch-clamp recordings were obtained using a  
101 Multiclamp 700A amplifier (Molecular Devices). Pipette (2.5-3  
102 MΩ resistance) capacitance was cancelled and series resistance (R<sub>s</sub>) between 5 and 8

103 m $\Omega$  was compensated at 80%.  $R_s$  was monitored regularly during the experiment and  
104 the recording was stopped when  $R_s$  changed significantly (> 20%). PCs were held at -60  
105 mV. The intracellular solution for voltage-clamp recording contained 140 mM CsCH<sub>3</sub>SO<sub>3</sub>,  
106 10 mM Phosphocreatine, 10 mM HEPES, 5 mM QX314-Cl, 10 mM BAPTA, 4 mM Na-  
107 ATP and 0.3 mM Na-GTP. Parallel fibers were stimulated extracellularly using a  
108 monopolar glass electrode filled with ACSF, positioned at least 100  $\mu$ m away from the  
109 PC to ensure a clear separation between the stimulus artifact and EPSCs. Pulse train  
110 and low-frequency stimulation were generated using an Isostim A320 isolated constant  
111 current stimulator (World Precision Instruments) controlled by WinWCP freeware (John  
112 Dempster, Strathclyde Institute of Pharmacy and Biomedical Sciences, University of  
113 Strathclyde, UK). The synaptic currents evoked in PCs were low-pass filtered at 2 KHz  
114 and sampled at 100 KHz (National Instruments).

115 *Simulation of transmitter release and Ca<sup>2+</sup> dynamics.* Models for Ca<sup>2+</sup>-dependent  
116 SVs fusion and replenishment (Millar et al., 2005; Wölfel et al., 2007; Sakaba, 2008)  
117 were transformed into the corresponding ordinary differential equations and numerically  
118 solved using Mathematica 10.0 (Wolfram Research).

119 Release rates were obtained by differentiation of the fused state. Paired-pulse  
120 ratios were calculated from the ratios of release probabilities obtained by the integration  
121 of release rates. Parameters for the release sensor part of the sequential two-pool  
122 model (**Fig. 7A**, V, corresponding to the RRP) were similar to those used by Sakaba  
123 (Sakaba, 2008) with forward rate  $k_{on} = 1 \cdot 10^8 \text{ M}^{-1} \text{ s}^{-1}$ , backward rate  $k_{off} = 3000 \text{ s}^{-1}$ ,  
124 cooperativity  $b = 0.25$ , and release rate  $\gamma = 5000 \text{ s}^{-1}$ . Parameters for the replenishment  
125 part of this model ( $R_0$ ,  $R_1$  representing the reluctant pool) were similar to those given by  
126 Millar et al. (2005) for a phasic synapse and found by trial and error. The forward and

127 backward rate constants of  $\text{Ca}^{2+}$ -dependent priming and unpriming were  $k_{\text{prim}} = 8 \cdot 10^8 \text{ M}^{-1}$   
128  $\text{s}^{-1}$  and  $k_{\text{unprim}} = 120 \text{ s}^{-1}$ , respectively.  $\text{Ca}^{2+}$ -independent filling and unfilling rates were  $k_{\text{fill}}$   
129  $= 200 \text{ s}^{-1}$  and  $k_{\text{unfil}} = 150 \text{ s}^{-1}$ , respectively. Ninety percent of released SVs were recycled  
130 into the unprimed pool, supported by a slow  $\text{Ca}^{2+}$ -independent filling rate of  $k_{\text{basal}} = 0.002$   
131  $\text{s}^{-1}$ , reflecting filling from a reserve pool. Recovery from Low-Frequency Depression  
132 (LFD, see results section) was simulated by restarting the model at high frequency with  
133 the size of the releasable pool set to the value at the end of the 2 Hz train, and the  
134 unprimed pool ( $R_0$ ) fully recovered. The one-pool model (**Fig. 7F**) and the parallel two-  
135 pool model (**Fig. 7G**) and their parameters were taken from Wölfel et al. (2007).

136 Releases triggering  $\text{Ca}^{2+}$  signals were simulated as repeated Gaussian curves  
137 spaced by the interstimulus intervals and adjusted to match the amplitude ( $22.5 \mu\text{M}$ ) and  
138 half-width ( $5 \mu\text{s}$ ) of the estimated action potential-mediated  $\text{Ca}^{2+}$  signal at the release  
139 sensor of PF synapses (Schmidt et al., 2013). In the sequential two-pool model (**Fig. 7A**)  
140 SVs replenishment was driven by residual  $\text{Ca}^{2+}$  with an amplitude of  $520 \text{ nM}$  per pulse,  
141 dropping exponentially with a time constant of  $42 \text{ ms}$  and summing linearly depending  
142 on the length of the interstimulus interval (Brenowitz and Regehr, 2007). For the two  
143 other models (**Fig. 7G,F**) SV replenishment occurred at a constant rate of  $2 \text{ SV/ms}$   
144 (Wölfel et al., 2007). Resting  $\text{Ca}^{2+}$  was assumed to be  $50 \text{ nM}$ .

145 *Data and statistical analysis.* Data were acquired using WinWCP 4.2.x freeware  
146 (John Dempster, SIPBS, University of Strathclyde, UK). Analyses were performed using  
147 PClamp9 (Molecular Devices), Igor (6.22A) graphing and analysis environment  
148 (Wavemetrics, USA). Error bars in figures show SEMs. Student's  $t$  test or paired  $t$ -test  
149 were performed when data were normally distributed; the Mann-Whitney Rank Sum Test  
150 (MWRST) or the signed rank test were used in all other cases. Statistical tests were  
151 performed using SigmaPlot 11 (Systat Software). The levels of significance are indicated

152 as *ns* (not significant) when  $p > 0.05$ , \* when  $p \leq 0.05$ , \*\* when  $p \leq 0.01$  and \*\*\* when  $p$   
153  $\leq 0.001$ .



154

155

## RESULTS

156

### Low-Frequency depression at the granule cell-Purkinje cell synapse

157

158

159

160

161

162

163

164

165

166

167

168

169

170

171

172

173

In order to better understand the mechanisms underlying the large facilitation of glutamate release during repetitive activities at the GC-PC synapse, we first analyzed the behavior of synaptic transmission over a broad range of frequencies within transverse cerebellar slices prepared from young mice (P17 to P25). To focus our study on presynaptic mechanisms and rule out the possibility of postsynaptic contribution, we pharmacologically blocked the induction of postsynaptic long term plasticity (LTP and LTD), NMDA-dependent plasticity (Bidoret et al., 2009; Bouvier et al., 2016), and endocannabinoid signaling (Marcaggi and Attwell, 2005; Beierlein et al., 2007). We then stimulated parallel fibers (PF) with trains of stimuli (50 pulses) elicited at different frequencies (2, 50 and 100 Hz) and at near-physiological temperature (34°C) (**Fig. 1A**). As already reported in rodent cerebellar slices (Kreitzer and Regehr, 2000; Valera et al., 2012; Schmidt et al., 2013), a sustained facilitation of synaptic transmission was observed up to the 25<sup>th</sup>-30<sup>th</sup> stimulus at frequencies above 50 Hz, indicating that the number of SVs released increased with stimulation frequency. The paired-pulse facilitation (PPF) at the first interval increased with frequency (PPF EPSC<sub>2</sub>/EPSC<sub>1</sub>: 171.15% ± 10.03 at 50 Hz, *n*=9, 215.96% ± 6.90 at 100 Hz, *n*=27, **Fig. 1A**). After 30 to 40 stimuli, a depression (EPSC<sub>*n*</sub>/EPSC<sub>1</sub> <1) was observed.

174

175

176

177

178

At many synapses, asynchronous release of quanta can be triggered by repeated activities (Rudolph et al., 2011; Kaeser and Regehr, 2013). Since asynchronous release can be detected by changes in the charge/amplitude ratio, we checked whether the charge and peak amplitude of EPSC evolved in similar ways during 50 Hz and 2 Hz stimulation. The perfect superimposition of normalized charges and amplitudes at any

179 stimulus number during 50 Hz and 2 Hz trains suggests that quanta released  
180 asynchronously did not participate in a detectable way during these protocols (**Fig. 1A**).  
181 This enables us to estimate the number of quanta released during these trains. Values  
182 of quantal parameters found at unitary GC-PC synapses in mice (Schmidt et al., 2013)  
183 were used to estimate the number of quanta released per varicosity at GC-PC synapse  
184 during train a 2 Hz, 50 Hz and 100 Hz. The number of PFs stimulated in each  
185 experiment was estimated by dividing the mean value of EPSC amplitude at 0.033 Hz by  
186 the median EPSC amplitude obtained at unitary GC-PC synapse (5.3 pA, including  
187 release failure, Schmidt et al., 2013). The number of quanta released during each  
188 protocol was estimated by dividing the cumulative EPSC amplitude by the number of PF  
189 stimulated and by the mean value of the quantal content obtained at unitary GC-PC  
190 synapse (8 pA, Schmidt et al., 2013). Cumulative EPSC amplitude plots demonstrate  
191 that the total number of quanta released is proportional to stimulation frequency.  
192 However, although initial facilitation during the first two or three pulses is higher in 100  
193 Hz train than in the 50 Hz train (Valera et al., 2012) no difference was observed in the  
194 maximal recruitment of releasable SVs between 50 Hz and 100 Hz (number of quanta  
195 released per bouton at 50 Hz =  $39.47 \pm 2.75$ ,  $n=9$  compared to  $40.14 \pm 7.50$  at 100 Hz,  
196  $n=27$ ,  $p=0.82$ ,  $t$ -test, **Fig. 1B**).

197 At 2 Hz, the synaptic responses failed to facilitate (**Fig. 1A, C**) and a sustained  
198 stimulation of PF during hundreds of stimuli led to a near full blockage of synaptic  
199 transmission (**Fig. 1D**). We named this rapid blockage of synaptic transmission “Low  
200 Frequency Depression” (LFD). Strikingly, the time course of EPSC amplitude in all the  
201 cells recorded ( $n=32$ ) started to decrease mono-exponentially (**Fig. 1E**, mean time  
202 constant for depression at 2 Hz =  $15.9 \text{ s} \pm 1.2 \text{ s}$ ) after a median delay of 7 stimuli. It  
203 should be noted that a lack of LFD was observed for less than 5% of PC recorded in the

204 vermis. These experiments were not taken in account for statistical analysis. Although it  
205 has already been shown that action potential is faithfully initiated and transmitted along  
206 parallel fibers at high frequencies and temperatures close to those in physiological  
207 conditions (35°C), (Kreitzer and Regehr, 2000; Isope and Barbour, 2002; Baginskas et  
208 al., 2009), repetitive extracellular stimulation of PF can induce decreases in fibers  
209 excitability via strong accumulations of K<sup>+</sup> in the extracellular space (Kocsis et al.,  
210 1983). Hence, it could not be excluded that a decrease in the number of stimulated PF  
211 underpinned part of the blockage observed during sustained 2 Hz stimulation. To  
212 challenge this hypothesis, LFD was elicited by stimulating GC somata rather than PF  
213 (**Fig. 1D**). The lack of any significant change in the onset and the kinetics of depression  
214 after stimulating GC somata (**Fig. 1D-E**) suggested that change in PF excitability cannot  
215 underlie LFD. This hypothesis also draws on several lines of evidences presented later  
216 in figures 3, 4.

217 While the onset and the plateau of LFD were highly variable from one experiment  
218 to another (**Fig. 1F**), these parameters stay stable for a given PC as long as the  
219 recording of EPSCs could be maintained. In a series of 8 experiments, two LFD (LFD#1  
220 and LFD#2) separated by a resting period of 5 to 10 minutes were successively elicited.  
221 As shown in figure 1G, a full recovery of EPSC amplitude was achieved at the first  
222 stimulus of LFD#2 elicited after the resting period (paired *t*-test performed on EPSC#1 of  
223 LFD#1 and LFD#2,  $p=0.94$ ,  $n=8$ ). Strikingly, LFD#2 followed kinetics identical to LFD#1;  
224 the similarity between LFD#1 and LFD#2 were confirmed by comparing the mean values  
225 of EPSC amplitudes obtained at any stimulus number by a paired *t*-test. While LFD#1  
226 and LFD#2 were statistically different when all stimuli were taken in account, we found  
227 no statistical differences for the first 60 stimuli ( $p=0.081$ ,  $n=8$ ) corresponding to the main  
228 time course of LFD (mean inhibition at stimulus #60:  $66.8\% \pm 15.1\%$ ,  $n=8$ ).

229           After pharmacologically blocking all known postsynaptic signaling events and  
230 therefore excluding a main postsynaptic contribution in LFD, these findings reveal for the  
231 first time that a sustained activity at low frequency can almost completely silences the  
232 release apparatus at GC terminals.

233

### 234           **Immediate recovery from LFD by high-frequency trains**

235           Given the evidence that high-frequency trains of inputs can lead to the rapid  
236 refilling of empty sites or even the recruitment of new active release sites (Saviane and  
237 Silver, 2006; Hallermann et al., 2010; Valera et al., 2012; Chamberland et al., 2014), we  
238 tested whether a full capacity of release could be recovered after LFD by an increase in  
239 stimulation frequency. Alternatively, LFD may result from an activity-dependent blockage  
240 of presynaptic voltage-dependent calcium channels (Xu and Wu, 2005). In the latter  
241 case, accelerating the refilling of the RRP or increasing the number of release sites  $N$   
242 should not restore glutamate release after LFD. LFD was induced by 300 stimuli at 2 Hz,  
243 and a train of 50 stimuli at 100 Hz was applied immediately after the last stimulus (**Fig.**  
244 **2A**). After a full block of synaptic transmission, the recovery of glutamate release  
245 capacity occurred within 10 ms (**Fig. 2B, C**) and was sustained throughout a train of 50  
246 stimuli (mean recovery within 10 ms:  $70.7\% \pm 7.6$ ). Strikingly, EPSC amplitudes in this  
247 100 Hz recovery train rapidly reached values observed at the same stimulus number in a  
248 control train elicited before LFD induction (**Fig. 2C**), suggesting that the populations of  
249 SVs recruited in these 2 conditions are the same or share the same release properties  
250 (same size, same  $p$ ). Mean amplitudes of EPSCs recorded during train at 50 Hz and  
251 100 Hz applied in control condition and after LFD induction were compared (**Fig. 2D**).  
252 Results showed that a full recovery from LFD was achieved within approximately 50 ms  
253 or 5 stimuli at 50 Hz (normalized EPSC amplitude at the 5<sup>th</sup> stimulus:  $203.67\% \pm 10.9$  for

254 trains applied in control condition compared to  $165.00\% \pm 21.29$  for trains applied after  
255 LFD,  $p=0.137$ ,  $t$ -test,  $n=13$ ) and 70 ms or 7 stimuli at 100 Hz (normalized EPSC  
256 amplitude at the 7<sup>th</sup> stimulus:  $207.24\% \pm 43.45$  for trains applied in control condition  
257 compared to  $191.12\% \pm 49.72$  for trains applied after LFD,  $p=0.181$ , MWRST,  $n=27$ ).

258 We then studied how the frequency of stimulation in the train influenced the ability  
259 of depressed synapses to recover a full capacity of release. Accordingly, 50 Hz and 20  
260 Hz trains were applied after LFD and compared to 50 Hz and 20 Hz trains applied in  
261 control conditions. Mean amplitudes of EPSCs recorded during train at 50 Hz applied in  
262 control condition were not statistically different from those recorded after LFD induction  
263 (**Fig. 2E**), but at 20 Hz the recovery was limited (**Fig. 2F**). Two hypotheses can explain  
264 this ultrafast recovery of synaptic transmission following LFD: (1) a frequency-dependent  
265 ultrafast replenishment of the RRP, or (2) the recruitment of a reluctant pool of SVs that  
266 cannot be mobilized at low frequency as suggested in Valera et al. (2012).

### 267 **Recovery from LFD relies on the fast recruitment of reluctant SVs by a high-** 268 **frequency train**

269 In order to probe the existence of a reluctant pool supplying SVs to the fully-  
270 releasable pool at high frequency, we checked whether the recovery from LFD by a 100  
271 Hz train could be affected by a previous exhaustion of this reluctant pool. As our  
272 previous results suggest that the reluctant pool can be recruited by short bursts at high  
273 frequency (paired-pulse/triplet stimulation at 50 or 100 Hz, Valera et al., 2012), we  
274 modified the paradigm of stimulation used to elicit LFD: LFD was induced by applying  
275 100 triplets of stimulation instead of the 300 single pulses at 2 Hz (the total number of  
276 stimuli is the same in both paradigms). The triplet frequency (from 10 to 200 Hz) was  
277 changed during the experiment. This LFD was named LFD<sub>triplet</sub>. Since LFD protocols can  
278 be repeated several times after a recovery time (**Fig. 1F**), we systematically applied the

279 LFD and LFD<sub>triplet</sub> protocols to each PC recorded. Strikingly, although the number of  
280 stimuli was the same in both type of protocols (LFD classic or LFD<sub>triplet</sub>; **Fig. 3A, B**),  
281 recovery from depression was highly influenced by triplet frequency: the higher the  
282 frequency inside the triplets, the lower the level of recovery was seen to be (**Fig. 3B**).  
283 For example, with triplets at 200 Hz during LFD<sub>triplet</sub>, synaptic transmission hardly  
284 recovers (maximal recovery 38.9 %  $\pm$  7.19  $n=6$ , compared to 196.7 %  $\pm$  8.7, after LFD,  
285  $n=27$ , **Fig. 4C**), indicating that LFD<sub>triplet</sub> depleted or disabled the population of SVs that  
286 support the recovery from LFD. If SVs 1) recruited only during LFD<sub>triplet</sub> (at the second  
287 and third pulse of triplet stimulation) and 2) during recovery from LFD belong to the  
288 same pool (reluctant pool), then the number of quanta released during LFD and LFD<sub>triplet</sub>  
289 should be the same. We performed a set of 18 experiments in which LFD and LFD<sub>triplet</sub>  
290 (triplets at 100 Hz) successively applied in the same cells were both followed by the  
291 application of a 100 Hz recovery train (**Fig. 4A, B**). Cumulative EPSC amplitudes were  
292 determined, and the approximate number of quanta released per bouton for the whole  
293 protocol (LFD or LFD<sub>triplet</sub> + recovery train) was estimated (**Fig. 4C**). The normalized  
294 cumulative EPSC amplitude was higher during LFD<sub>triplet</sub> than during LFD (6440.9%  $\pm$   
295 945% for LFD compared to 9353.5%  $\pm$  1199.9% for LFD<sub>triplet</sub>,  $p<0.001$ , paired  $t$  test,  
296  $n=18$ , **Fig. 4C, D**). However, when the cumulative EPSC amplitude during LFD or  
297 LFD<sub>triplet</sub> was summed with the cumulative EPSC amplitude of the recovery train, no  
298 further statistical differences were observed (11696.3%  $\pm$  1163.6 for LFD compared to  
299 11379.0%  $\pm$  1349.6% for LFD<sub>triplet</sub>,  $p=0.61$ , paired  $t$  test,  $n=18$ , **Fig. 4C, D**). The number  
300 of quanta released during LFD was statistically lower than during LFD<sub>triplet</sub> ( $42.7 \pm 6.2$   
301 quanta per varicosity for LFD compared to  $60.8 \pm 8.0$  quanta per varicosity for LFD<sub>triplet</sub>,  
302  $p<0.01$ , paired  $t$ -test,  $n=18$ , **Fig. 4E**). However, when the number of quanta released  
303 during LFD or LFD<sub>triplet</sub> was summed with the number of quanta released during the

304 recovery train, no further statistical differences were observed ( $77.5 \pm 7.7$  quanta per  
305 varicosity for LFD + recovery compared to  $74.8 \pm 8.9$  quanta per varicosity for LFD<sub>triplet</sub> +  
306 recovery,  $p=0.51$ , paired  $t$ -test,  $n=18$ , **Fig. 4E**). Moreover, the number of quanta  
307 released during LFD and solely during recovery was statistically identical ( $42.7 \pm 6.2$   
308 quanta per varicosity for LFD compared to  $32.1 \pm 2.3$  quanta per varicosity for recovery,  
309  $p=0.1$ , paired  $t$ -test,  $n=18$ , **Fig. 4E**). These experiments indicate that the RRP in GC  
310 boutons segregate in two distinct pools: the fully-releasable pool that can be released by  
311 a single action potential and a reluctant pool that can only be recruited during bursts of  
312 action potential reaching frequencies  $\geq 50$  Hz.

313 While it may seem improbable, it may be argued that LFD and recovery by 100  
314 Hz train could result from fast changes in PF excitability (Kocsis et al., 1983). However,  
315 the fact that 100 Hz trains are not able to reactivate synaptic transmission after LFD<sub>triplet</sub>  
316 is another argument as to why this hypothesis cannot be retained.

### 317 **A two-pool model accounts for basic experimental findings**

318 Our data suggest a segregation of SVs into different pools at GC terminals, which  
319 is in line with several previous studies (Valera et al., 2012; Ishiyama et al., 2014;  
320 Brachtendorf et al., 2015; Miki et al., 2016). They further suggest that SVs can be  
321 recruited from a reluctant pool into an fully-releasable pool on a millisecond timescale.  
322 Different previously published models could be suitable to account for these findings  
323 (**Fig. 5**), including a sequential two-pool model with  $\text{Ca}^{2+}$ -dependent recruitment (Millar  
324 et al., 2005; Sakaba, 2008), a single-pool model with  $\text{Ca}^{2+}$ -independent replenishment  
325 and a parallel two-pool model with intrinsically different SVs in which both pools are  
326 restored independently of  $\text{Ca}^{2+}$  (Wölfel et al., 2007; Schneggenburger et al., 2012). An  
327 important demand on such model is that it needs to account for our experimental results  
328 of high-frequency facilitation and LFD in a single model.

329 First, we analyzed a sequential two-pool model of release and  $\text{Ca}^{2+}$ -dependent  
330 recruitment (Millar et al., 2005; Sakaba, 2008). In this model, release is triggered via a  
331  $\text{Ca}^{2+}$ -driven, five-site sensor from a fraction of releasable SVs (**Fig. 6A**, see Methods).  
332 These SVs become replenished in two steps. The first step is a  $\text{Ca}^{2+}$ -dependent priming  
333 step ( $R_0 \rightarrow R_1$ ), followed by a  $\text{Ca}^{2+}$ -independent filling step ( $R_1 \rightarrow V$ ), i.e.  $R_0 + R_1$   
334 corresponds to the reluctant pool and  $V$  to the fully-releasable pool in our experiments.

335 In the simulations, release was triggered by Gaussian shaped  $\text{Ca}^{2+}$  signals with  
336 amplitudes of  $\sim 22 \mu\text{M}$  (Schmidt et al., 2013).  $\text{Ca}^{2+}$ -dependent recruitment was assumed  
337 to be driven by residual  $\text{Ca}^{2+}$  (**Fig. 6B**) with an initial amplitude of 520 nM and a decay  
338 constant of 42 ms (Brenowitz and Regehr, 2007). During high-frequency activation (100  
339 Hz), this residual  $\text{Ca}^{2+}$  sums linearly (Brenowitz and Regehr, 2007), building up to a  
340 steady state amplitude of  $\sim 2 \mu\text{M}$  across 50 stimuli. This high concentration of residual  
341  $\text{Ca}^{2+}$  drove rapid recruitment of SVs from the reluctant pool into the fully-releasable pool,  
342 leading to a transient increase in the size of this pool (**Fig. 6C**; Valera et al., 2012).  
343 Acting in concert with slow  $\text{Ca}^{2+}$  unbinding from the release sensor, which generates a  
344 moderate facilitation on the ms timescale (Bornschein et al., 2013), SV recruitment  
345 resulted in prolonged and facilitated release consistent with our experimental  
346 observations (**Fig. 6D, E**, compared with **Fig. 1**). During low-frequency activation (2 Hz),  
347 on the other hand, residual  $\text{Ca}^{2+}$  dropped back to its resting level between pulses and  
348 recruited SVs returned to the unprimed pool prior to the next stimulus. This resulted in  
349 the progressive depletion of fully-releasable SVs, leading to LFD. Renewed driving of  
350 the depressed model at high frequency reproduced a rapid recovery from the  
351 depression, and was followed by facilitation (**Fig. 6D** compared with **Fig. 2**), thus  
352 illustrating the recruitment of the reluctant pool.



353           Next, we simulated release using a single pool model consisting of the “allosteric”  
354 release sensor (Lou et al., 2005) supplemented with a replenishment step at a fixed,  
355  $\text{Ca}^{2+}$ -independent rate (one-pool model, Wölfel et al., 2007). Finally, we modeled release  
356 using two parallel pools of releasable SVs differing in their intrinsic release rate  
357 constants, thereby forming a pool of fast and a pool of slowly releasing vesicles (parallel  
358 two-pool model, Wölfel et al., 2007). Both pools were replenished independent of  $\text{Ca}^{2+}$  at  
359 a fixed rate as in the above single pool model. Notably, both the one-pool model and the  
360 parallel two-pool model predict a depression of release during high-frequency activation  
361 and a strong facilitation during sustained low-frequency stimulation (**Fig. 6F,G**). This is in  
362 stark contrast to our experimental results that showed the opposite behavior of GC  
363 synapses. Thus, although the latter two models successfully described several aspects  
364 of release at the depressing calyx of Held synapse that operates with a very large RRP  
365 (Sätzler et al., 2002), it appears that the small cerebellar cortical GC synapse utilizes  
366 different mechanisms to sustain release based on a small RRP and rapid,  $\text{Ca}^{2+}$  driven  
367 recruitment.

368           Taken together, these findings show that several aspects of our experimental  
369 findings, in particular high-frequency facilitation and LFD, can be reproduced by a simple  
370 sequential two-pool model with  $\text{Ca}^{2+}$ -dependent recruitment but not, if recruitment is  
371 assumed to be  $\text{Ca}^{2+}$ -independent. This does not exclude a contribution of more  
372 sophisticated mechanisms like activity dependent a posteriori modifications (Wölfel et  
373 al., 2007) or a separate facilitation sensor (Atluri and Regehr, 1996; Jackman et al.,  
374 2016) but hints towards the minimal requirements for sustained release from a small  
375 terminal operating with a small number of SVs in the RRP.

376           **Recovery from LFD depends on the size of both pools**

377 The sequential model predicts that the kinetics of refilling of the fully-releasable  
378 pool after LFD depends on the size of in the reluctant pool. To test this hypothesis, we  
379 determined the recovery kinetics of the fully-releasable pool after LFD (**Fig. 7A**, red  
380 points) and LFD<sub>triplet</sub> (triplet at 200 Hz; **Fig. 7A**, blue points) by applying a single stimulus  
381 at very low frequency (0.033 Hz) beginning 30 s after the end of the LFD protocol. As  
382 shown in Figure 7A, full recovery after LFD is described by a single exponential function  
383 ( $\tau = 153.8$  s,  $R^2 = 0.93$ ), indicating a single-step process. However, recovery following  
384 LFD<sub>triplet</sub> was biphasic: during an initial phase, release remained almost fully blocked.  
385 This initial phase was followed by a second phase that was again characterized by a  
386 single exponential time course ( $\tau = 212.8$  s, **Fig. 7A**). Averaged time courses suggest  
387 that the first phase could be considered as a delay, since a simple 90 s shift led to an  
388 identical monoexponential recovery in both LFD (mean  $\tau = 156.3$  s,  $R^2 = 0.98$ ,  $n = 8$ ) and  
389 LFD<sub>triplet</sub> (mean  $\tau = 149.3$  s,  $R^2 = 0.96$ ,  $n = 6$ ) (**Fig. 7B,C**). This set of experiments  
390 suggests after depletion of both the reluctant and fully-releasable pools, the delay  
391 preceding the exponential phase of recovery from depression ( $\sim 90$  s) might reflect the  
392 time required to reconstitute the reluctant pool and then to refill the fully-releasable pool  
393 from the reluctant pool.

394 To check this hypothesis, the following paradigm was designed: SVs from both  
395 the reluctant and fully-releasable pools were released and inactivated by LFD<sub>triplet</sub>  
396 (triplets at 100 Hz), then a 100 Hz test train was applied after a variable resting period  
397 (500 ms, 10 s or 1 min of rest after the end of LFD, **Fig. 7D**). The amplitudes of EPSCs  
398 recorded in the test trains were compared to those obtained from the application of a  
399 similar train in a control condition (before LFD). As shown in Figure 7D, the amplitude of  
400 EPSCs during the test trains increased proportionally to the length of the resting period.  
401 More interestingly, after 1 min of rest, the first responses in the test train were still fully

402 blocked (**Fig. 7E**) whereas the amplitudes of the late responses (after stimuli # 11-12 in  
403 the test train) were similar to the corresponding responses in the control train (**Fig. 7F**).  
404 This demonstrates that after 1 minute of rest, no SVs from the fully-releasable pool were  
405 ready to be released, despite partial reconstitution of the reluctant pool and the  
406 replenishment of the fully-releasable pool by the reluctant pool.

407

### 408 **Reluctant SVS can be recruited by increasing $\text{Ca}^{2+}$ entry**

409 Finally, we investigated whether SVs in the reluctant pool are maintained in a low  
410 probability state. If so, the reluctant pool could be affected by manipulations known to  
411 affect  $p_r$ . We therefore studied the properties of LFD and of its recovery by 100 Hz train  
412 after changes in  $p_r$  or by affecting the spatiotemporal profile of  $[\text{Ca}^{2+}]$  through the use of  
413 EGTA-AM (10  $\mu\text{M}$ ), a slow  $\text{Ca}^{2+}$  chelator that does not affect  $[\text{Ca}^{2+}]$  in the nanodomain  
414 during single AP but that may impair the building-up of  $[\text{Ca}^{2+}]$  during high-frequency train  
415 (Schmidt et al., 2013). Based on our work, increasing  $[\text{Ca}^{2+}]_e$  from 2.5 mM (control  
416 condition) to 4 mM leads  $p_r$  to increase from 0.25 to 0.67 for SVs in the fully-releasable  
417 pool (Valera et al., 2012). In the presence of 4 mM  $[\text{Ca}^{2+}]_e$ , LFD time course was barely  
418 affected. Neither the delay (mean number of stimulus:  $14.5 \pm 2.8$ ,  $n=30$  at  $[\text{Ca}^{2+}]_e = 2.5$   
419 mM compared to  $17.6 \pm 8.0$ ,  $n=5$ , at  $[\text{Ca}^{2+}]_e$ ,  $p=0.6$ , MWRST), nor the plateau of LFD  
420 (mean percentage of initial responses:  $14.2\% \pm 2.0\%$ ,  $n=30$  at  $[\text{Ca}^{2+}]_e = 2.5$  mM  
421 compared to  $9.3\% \pm 1.4\%$ ,  $n=5$ , at  $[\text{Ca}^{2+}]_e=4$  mM,  $p=0.69$ , MWRST) or the decay time  
422 constant (tau:  $14.3 \text{ s} \pm 1.3 \text{ s}$ ,  $n=30$  at  $[\text{Ca}^{2+}]_e = 2.5$  mM compared to  $18.9 \text{ s} \pm 6.8 \text{ s}$ ,  $n=5$ ,  
423 at  $[\text{Ca}^{2+}]_e=4$  mM,  $p=0.87$ , MWRST) were statistically different in low and high  $\text{Ca}^{2+}$   
424 conditions (**Fig. 8A, B**). At the opposite, recovery from LFD was strongly reduced  
425 (maximal recovery  $85.5\% \pm 11.6$   $n=5$ , **Fig. 8B**) high  $\text{Ca}^{2+}$  condition. This indicates that  
426 part of the reluctant pool was actually recruited during LFD upon increase in  $p_r$ . Finally,

427 we tested whether recruitment of the reluctant pool could be affected by impairing the  
428 spatiotemporal profile of  $[Ca^{2+}]$ . Accordingly, LFD and the recovery from LFD by 100 Hz  
429 train were probed before and after application of 10  $\mu$ M EGTA-AM. As previously  
430 showed, the application of 10  $\mu$ M EGTA-AM did not affect the basal release of glutamate  
431 (**Fig. 8C**). Also, while LFD time course was insensitive to EGTA-AM ( $p=0,61$ , paired  $t$ -  
432 test performed on 3 successive EPSCs,  $n=9$ ), the recovery from LFD was slightly slowed  
433 down and reduced during the first responses of the 100 Hz train ; a statistical differences  
434 could be detected only at stimulus #4 and #5 of the train ( $p=0.031$  for both stimuli,  
435 signed rank test,  $n=6$ ) (**Fig. 8D**).

## 436 DISCUSSION

437 The present work demonstrates that the release of glutamate and presynaptic  
438 plasticity at the GC-PC synapse are shaped by the existence of 2 pools of releasable  
439 SVs, namely fully-releasable and reluctant SVs, bearing different properties for release.  
440 Whether both pools belongs or not to the RRP is still a matter of debate (Pan and  
441 Zucker, 2009; Neher, 2015) but if the RRP is restrained to SVs that can fuse with a  
442 single AP, as proposed recently (Miki et al., 2016), then it would correspond only to fully-  
443 primed SVs.

### 444 Mechanism of recruitment of reluctant SVs

445 Our results showed that reluctant SVs that cannot be recruited during single  
446 stimuli at low-frequencies supports the release of glutamate during high-frequency train,  
447 even after a full depletion of fully-releasable SVs (**Fig. 2-4**). At GC-PC synapses, the  
448 localization of fusion events are restricted to distances that do not exceeds tens of  
449 nanometers from presynaptic  $Ca^{2+}$  entry even during short burst at high frequencies  
450 (Schmidt et al., 2013). The high speed of conversion (<10 ms) of reluctant SVs into fully

451 releasable SVs suggests that reluctant SVs are docked in the nanodomain as a physical  
452 repositioning of reluctant SVs near the  $\text{Ca}^{2+}$ -channels (positional priming) is probably too  
453 slow to occur with such fast kinetics.

454 The molecular mechanisms associated with the reluctant state and involved in the  
455 fast recruitment of reluctant SVs at GC-PC synapses are unknown, and are beyond the  
456 scope of this study. Our experiments suggest that fully-releasable SVs and reluctant  
457 SVs differ by their  $\text{Ca}^{2+}$  sensitivity and that 2  $\text{Ca}^{2+}$  sensors differentially shape glutamate  
458 release during low- and fast-frequency stimulation (**Fig. 8**). In central synapses, the  $\text{Ca}^{2+}$   
459 sensors synaptotagmin 1, 2 and 9 are involved in fast synchronous release triggered by  
460 a single AP (Xu et al., 2007) whereas synaptotagmin 7 which have slower kinetics for  
461 binding  $\text{Ca}^{2+}$  is involved in delayed asynchronous release (Wen et al., 2010; Luo et al.,  
462 2015). The recent finding that a lack of synaptotagmin 7 specifically impairs PPF without  
463 affecting  $p_r$  (Jackman et al., 2016) makes this isoform as a good candidate for being  
464 involved in reluctant mechanisms. In another hand, Munc13s, actin and myosin II  
465 appears as good candidates for the fast recruitment of reluctant SVs. At the calyx of  
466 Held, actin is involved in the recruitment of reluctant SVs after the depletion of the FRP  
467 (Lee et al., 2012) and at GC-MLI synapses, actin and myosin II regulate the fast transfer  
468 of SVs from a “transition pool” to a “docked pool” (Miki et al., 2016). In the same  
469 synapses, the presence of Munc13s is required in a recently described “superpriming”  
470 step that would correspond to the final maturation stage of fully-competent SVs (Lee et  
471 al., 2013; Lipstein et al., 2013; Ishiyama et al., 2014). If we cannot exclude that identical  
472 mechanisms underpin the transition between both pools at the GC-PC synapse, one  
473 should keep in mind that this latter stands out by its large and sustained facilitation  
474 during high-frequency trains while, at the opposite, depression dominate upon high  
475 frequency stimulation at the calyx of Held and at some GC-MLI synapses

476 (Schneppenburger et al., 1999; Bao et al., 2010). This suggests that both organization of  
477 SVs at the active zone and molecular mechanisms involved in the late stages of  
478 exocytosis are different or optimized at GC-PC synapses.

479 Both experimental data (**Fig. 7**) and *in silico* simulation (**Fig. 6**) suggest that  
480 reluctant SVs are recruited sequentially during high-frequency trains. Our model  
481 proposes that SVs can reversibly shift from the fully-releasable status to the reluctant  
482 one but do not explain why disequilibrium toward the reluctant state leading to LFD  
483 occurs at 2 Hz and not at slower frequencies. Hence, while some experiments clearly  
484 indicate that both pools are recruited sequentially (**Fig. 7**), one cannot exclude additional  
485 “a posteriori” mechanisms impeding the functioning of active release sites in a range of  
486 low frequencies (Wölfel et al., 2007; Schneppenburger et al., 2012). After SV fusion,  
487 release sites have to be purged of SV membrane and the time course of this clearance  
488 by endocytosis may act as a limiting factor for exocytosis during repetitive activities  
489 (Hosoi et al., 2009; Hua et al., 2013). In another hand, as proposed in invertebrates  
490 synapses (Silverman-Gavrila et al., 2005; Doussau et al., 2010), LFD may arise from an  
491 imbalance in the activation of presynaptic kinases and phosphatases and as such the  
492 kinase/phosphatase balance would act as a frequency sensor regulating the equilibrium  
493 between the two pools.

494 Our estimation indicates that the number of SVs that can be released during high-  
495 frequency trains after a full depletion of fully-releasable SVs corresponds to the size of  
496 the reluctant pool (**Fig. 5**). Since the number of SVs released per bouton (30-40 SVs,  
497 **Fig. 1,5**) during 50/100 Hz trains, LFD, LFD<sub>triplet</sub> or during recovery trains far exceeds the  
498 number of docked SVs counted in one varicosity at GC-PC synapses (4-8 SVs, Xu-  
499 Friedman et al., 2001), we postulate that the two releasable pools are refilled by other  
500 pools (recycling pool, reserve pool) during LFD, LFD<sub>triplet</sub> and during the late phase of

501 high-frequency trains. Previous works performed in other cerebellar synapses suggest  
502 that proteins of the cytomatrix (bassoon, actin, myosin II) (Hallermann et al., 2010;  
503 Hallermann and Silver, 2013; Miki et al., 2016) in concert with a  $\text{Ca}^{2+}$ -driven  
504 acceleration of replenishment kinetics trains (Saviane and Silver, 2006) participate to the  
505 refilling of empty release sites during the last phase of high-frequency train.

### 506 **Segregation of releasable SVs in 2 pools shapes short-term plasticity**

507 Neuronal networks in the cerebellar cortex have to process sensory information  
508 coded at ultra-high frequencies (up to 1 kilohertz, van Kan et al., 1993; Arenz et al.,  
509 2008, 2009). Most of this information is conveyed to the granular layer, the input stage of  
510 the cerebellar cortex, via the mossy fiber (MF) pathway. Strikingly, MF-GC synapses can  
511 sustain high frequency trains of input by using a specific arrangement of the presynaptic  
512 machinery to achieve ultra-fast reloading of SVs (Saviane and Silver, 2006; Rancz et al.,  
513 2007; Hallermann et al., 2010; Ritzau-Jost et al., 2014). However, debate continues over  
514 how these high frequencies inputs are integrated at the GC-PC synapses, the output  
515 stage of the cerebellar cortex and the major site for information storage in the  
516 cerebellum (Thach et al., 1992; Ito, 2006; D'Angelo and De Zeeuw, 2009). We already  
517 showed that none of the classical mechanisms for facilitation (including the buffer  
518 saturation model and residual  $\text{Ca}^{2+}$ , Pan and Zucker, 2009; Regehr, 2012) that predict a  
519 pure increase in  $p_r$  during PPF can satisfactorily account for the high PPF at GC-PC  
520 synapses and for its unusual ability to sustain glutamate release during tens of APs at  
521 high-frequency trains. During a train of APs at high frequency, the local  $[\text{Ca}^{2+}]$  at release  
522 sites increases with AP number in the train (Schmidt et al., 2013; Miki et al., 2016)  
523 leading to an immediate increase in  $N$  that underlies high values of PPF (Valera et al.,  
524 2012; Brachtendorf et al., 2015). Here we showed that this increase in  $N$  arises from the  
525 fast recruitment of reluctant SVs into the fully-releasable pool. A fast and sequential

526 recruitment of a “replacement pool” (analogous to the reluctant pool) in a docked pool  
527 (analogous to the fully-releasable pool) accounting for PPF have been recently  
528 described at GC-MLI synapses (Miki et al., 2016) but the GC-PC synapse is unique in so  
529 far that the sequential recruitment of both pools is associated with the possibility to  
530 specifically inactivate the fully-releasable pool by low-frequency stimulation. The  
531 combination of both mechanisms gives the striking possibility to filter repetitive activities  
532 around 2 Hz and to drastically invert the orientation of presynaptic plasticity (full  
533 depression versus strong facilitation) in response to changes in the stimulation  
534 frequency (**Fig. 2**). Finally, during high-frequency inputs, GC-PC synapses are able to  
535 reset and standardized synaptic efficacy independently of the recent history of previous  
536 events (**Fig. 2**).

#### 537 **Physiological implications of the filtering of GC activity**

538 These results provide new hypotheses about information processing in the MF-  
539 GC-PC pathway. *In vivo* experiments have shown that in lobules IV and V, GCs  
540 responding to joint rotation receive spontaneous synaptic inputs from MF leading to  
541 spontaneous firing at 2-10 Hz in GCs. Upon joint movement, GCs discharge shifts  
542 instantaneously in burst mode with frequencies from ~50 Hz to 300 Hz (Jörntell and  
543 Ekerot, 2006). Based on our work, we propose a model in which GC-PC synapses could  
544 act as a filter of GC activity. In the absence of sensory input, GC inputs to PCs would be  
545 filtered by an active silencing of presynaptic terminals. However, during joint movement,  
546 the efficient transmission of high-frequency activity from MF to GC (Saviane and Silver,  
547 2006; Rancz et al., 2007; Hallermann et al., 2010) and from GC to PC (Valera et al.,  
548 2012), combined with the recruitment of the reluctant pool by high frequency trains at  
549 GC-PC terminals, would allow a reliable transmission of sensory information to PC. In  
550 such a model, the filtering of low-frequency activities originating from numerous GCs



551 would enhance the signal to noise ratio and help PC to recognize relevant inputs  
552 generated by sensory inputs from spurious GC activities. Future studies could  
553 investigate the response of inhibitory transmission, and more specifically feed-forward  
554 inhibition, to the wide range of frequency observed in the GC firing pattern.

555

## 556 REFERENCES

- 557 Arenz A, Bracey EF, Margrie TW (2009) Sensory representations in cerebellar granule cells. *Curr Opin*  
558 *Neurobiol* 19:445–451 Available at: <http://www.ncbi.nlm.nih.gov/pubmed/19651506> [Accessed  
559 November 26, 2013].
- 560 Arenz A, Silver RA, Schaefer AT, Margrie TW (2008) The contribution of single synapses to sensory  
561 representation in vivo. *Science* 321:977–980 Available at:  
562 [http://www.pubmedcentral.nih.gov/articlerender.fcgi?artid=2771362&tool=pmcentrez&rendertype=](http://www.pubmedcentral.nih.gov/articlerender.fcgi?artid=2771362&tool=pmcentrez&rendertype=abstract)  
563 [abstract](http://www.pubmedcentral.nih.gov/articlerender.fcgi?artid=2771362&tool=pmcentrez&rendertype=abstract) [Accessed November 21, 2013].
- 564 Atluri PP, Regehr WG (1996) Determinants of the time course of facilitation at the granule cell to Purkinje  
565 cell synapse. *J Neurosci* 16:5661–5671 Available at: <http://www.ncbi.nlm.nih.gov/pubmed/8795622>  
566 [Accessed November 26, 2013].
- 567 Baginskaskas A, Palani D, Chiu K, Raastad M (2009) The H-current secures action potential transmission at  
568 high frequencies in rat cerebellar parallel fibers. *Eur J Neurosci* 29:87–96 Available at:  
569 <http://www.ncbi.nlm.nih.gov/pubmed/19087162> [Accessed November 26, 2013].
- 570 Bao J, Reim K, Sakaba T (2010) Target-dependent feedforward inhibition mediated by short-term  
571 synaptic plasticity in the cerebellum. *J Neurosci* 30:8171–8179 Available at:  
572 <http://www.ncbi.nlm.nih.gov/pubmed/20554867> [Accessed November 26, 2013].
- 573 Beierlein M, Fioravante D, Regehr WG (2007) Differential expression of posttetanic potentiation and  
574 retrograde signaling mediate target-dependent short-term synaptic plasticity. *Neuron* 54:949–959  
575 Available at:  
576 [http://www.pubmedcentral.nih.gov/articlerender.fcgi?artid=3251520&tool=pmcentrez&rendertype=](http://www.pubmedcentral.nih.gov/articlerender.fcgi?artid=3251520&tool=pmcentrez&rendertype=abstract)  
577 [abstract](http://www.pubmedcentral.nih.gov/articlerender.fcgi?artid=3251520&tool=pmcentrez&rendertype=abstract) [Accessed November 25, 2013].
- 578 Bidoret C, Ayon A, Barbour B, Casado M (2009) Presynaptic NR2A-containing NMDA receptors implement  
579 a high-pass filter synaptic plasticity rule. *Proc Natl Acad Sci U S A* 106:14126–14131 Available at:  
580 [http://www.pubmedcentral.nih.gov/articlerender.fcgi?artid=2729031&tool=pmcentrez&rendertype=](http://www.pubmedcentral.nih.gov/articlerender.fcgi?artid=2729031&tool=pmcentrez&rendertype=abstract)  
581 [abstract](http://www.pubmedcentral.nih.gov/articlerender.fcgi?artid=2729031&tool=pmcentrez&rendertype=abstract) [Accessed February 26, 2015].
- 582 Bornschein G, Arendt O, Hallermann S, Brachtendorf S, Eilers J, Schmidt H (2013) Paired-pulse facilitation  
583 at recurrent Purkinje neuron synapses is independent of calbindin and parvalbumin during high-  
584 frequency activation. *J Physiol* 591:3355–3370 Available at:  
585 <http://www.ncbi.nlm.nih.gov/pubmed/23671160> [Accessed November 15, 2013].
- 586 Borst JGG, Soria van Hoeve J (2012) The Calyx of Held Synapse: From Model Synapse to Auditory Relay.  
587 *Annu Rev Physiol* 74:199–224.
- 588 Bouvier G, Higgins D, Spolidoro M, Carrel D, Mathieu B, Léna C, Dieudonné S, Barbour B, Brunel N,  
589 Casado M (2016) Burst-Dependent Bidirectional Plasticity in the Cerebellum Is Driven by  
590 Presynaptic NMDA Receptors. *Cell Rep*:104–116 Available at:  
591 <http://linkinghub.elsevier.com/retrieve/pii/S2211124716302285>.

- 592 Brachtendorf S, Eilers J, Schmidt H (2015) A use-dependent increase in release sites drives facilitation at  
593 calretinin-deficient cerebellar parallel-fiber synapses. *Front Cell Neurosci* 9:27 Available at:  
594 [http://www.pubmedcentral.nih.gov/articlerender.fcgi?artid=4315043&tool=pmcentrez&rendertyp](http://www.pubmedcentral.nih.gov/articlerender.fcgi?artid=4315043&tool=pmcentrez&rendertype=abstract)  
595 [e=abstract](http://www.pubmedcentral.nih.gov/articlerender.fcgi?artid=4315043&tool=pmcentrez&rendertype=abstract) [Accessed February 26, 2015].
- 596 Brenowitz SD, Regehr WG (2007) Reliability and heterogeneity of calcium signaling at single presynaptic  
597 boutons of cerebellar granule cells. *J Neurosci* 27:7888–7898 Available at:  
598 <http://www.ncbi.nlm.nih.gov/pubmed/17652580> [Accessed November 26, 2013].
- 599 Chamberland S, Evstratova A, Tóth K (2014) Interplay between Synchronization of Multivesicular Release  
600 and Recruitment of Additional Release Sites Support Short-Term Facilitation at Hippocampal Mossy  
601 Fiber to CA3 Pyramidal Cells Synapses. *J Neurosci* 34:11032–11047 Available at:  
602 <http://www.ncbi.nlm.nih.gov/pubmed/25122902> [Accessed September 18, 2014].
- 603 D’Angelo E, De Zeeuw CI (2009) Timing and plasticity in the cerebellum: focus on the granular layer.  
604 *Trends Neurosci* 32:30–40 Available at: <http://www.ncbi.nlm.nih.gov/pubmed/18977038> [Accessed  
605 September 19, 2014].
- 606 Doussau F, Humeau Y, Benfenati F, Poulain B (2010) A novel form of presynaptic plasticity based on the  
607 fast reactivation of release sites switched off during low-frequency depression. *J Neurosci*  
608 30:16679–16691 Available at: <http://www.ncbi.nlm.nih.gov/pubmed/21148007> [Accessed  
609 November 26, 2013].
- 610 Hallermann S, Fejtova A, Schmidt H, Weyhersmüller A, Silver RA, Gundelfinger ED, Eilers J (2010) Bassoon  
611 speeds vesicle reloading at a central excitatory synapse. *Neuron* 68:710–723 Available at:  
612 [http://www.pubmedcentral.nih.gov/articlerender.fcgi?artid=3004039&tool=pmcentrez&rendertyp](http://www.pubmedcentral.nih.gov/articlerender.fcgi?artid=3004039&tool=pmcentrez&rendertype=abstract)  
613 [e=abstract](http://www.pubmedcentral.nih.gov/articlerender.fcgi?artid=3004039&tool=pmcentrez&rendertype=abstract) [Accessed November 10, 2013].
- 614 Hallermann S, Silver RA (2013) Sustaining rapid vesicular release at active zones: potential roles for  
615 vesicle tethering. *Trends Neurosci* 36:185–194 Available at:  
616 <http://www.ncbi.nlm.nih.gov/pubmed/23164531> [Accessed November 15, 2013].
- 617 Hosoi N, Holt M, Sakaba T (2009) Calcium dependence of exo- and endocytotic coupling at a  
618 glutamatergic synapse. *Neuron* 63:216–229 Available at:  
619 <http://www.ncbi.nlm.nih.gov/pubmed/19640480> [Accessed September 4, 2014].
- 620 Hua Y, Woehler A, Kahms M, Haucke V, Neher E, Klingauf J (2013) Blocking endocytosis enhances short-  
621 term synaptic depression under conditions of normal availability of vesicles. *Neuron* 80:343–349  
622 Available at: <http://www.ncbi.nlm.nih.gov/pubmed/24139039> [Accessed January 29, 2014].
- 623 Ishiyama S, Schmidt H, Cooper BH, Brose N, Eilers J (2014) Munc13-3 Superprimed Synaptic Vesicles at  
624 Granule Cell-to-Basket Cell Synapses in the Mouse Cerebellum. *J Neurosci* 34:14687–14696  
625 Available at: <http://www.jneurosci.org/cgi/doi/10.1523/JNEUROSCI.2060-14.2014> [Accessed  
626 November 1, 2014].
- 627 Isope P, Barbour B (2002) Properties of unitary granule cell->Purkinje cell synapses in adult rat cerebellar  
628 slices. *J Neurosci* 22:9668–9678 Available at: <http://www.ncbi.nlm.nih.gov/pubmed/12427822>.
- 629 Ito M (2006) Cerebellar circuitry as a neuronal machine. *Prog Neurobiol* 78:272–303 Available at:  
630 <http://www.ncbi.nlm.nih.gov/pubmed/16759785> [Accessed November 13, 2013].

- 631 Jackman SL, Turecek J, Belinsky JE, Regehr WG (2016) The calcium sensor synaptotagmin 7 is required for  
632 synaptic facilitation. *Nature* 529:88–91 Available at:  
633 <http://www.nature.com/doi/10.1038/nature16507>\n<http://www.ncbi.nlm.nih.gov/pubmed/26738595>.  
634
- 635 Jörntell H, Ekerot C-F (2006) Properties of somatosensory synaptic integration in cerebellar granule cells  
636 in vivo. *J Neurosci* 26:11786–11797 Available at: <http://www.ncbi.nlm.nih.gov/pubmed/17093099>  
637 [Accessed November 23, 2013].
- 638 Kaeser PS, Regehr WG (2013) Molecular Mechanisms for Synchronous, Asynchronous, and Spontaneous  
639 Neurotransmitter Release. *Annu Rev Physiol* 76:1–31 Available at:  
640 <http://www.pubmedcentral.nih.gov/articlerender.fcgi?artid=4503208&tool=pmcentrez&rendertype=abstract> [Accessed January 15, 2014].  
641
- 642 Kocsis JD, Malenka RC, Waxman SG (1983) Effects of extracellular potassium concentration on the  
643 excitability of the parallel fibres of the rat cerebellum. *J Physiol* 334:225–244 Available at:  
644 <http://doi.wiley.com/10.1113/jphysiol.1983.sp014491>\n<http://www.ncbi.nlm.nih.gov/pubmed/6864558>\n<http://www.pubmedcentral.nih.gov/articlerender.fcgi?artid=PMC1197311>.  
645
- 646 Kreitzer a C, Regehr WG (2000) Modulation of transmission during trains at a cerebellar synapse. *J*  
647 *Neurosci* 20:1348–1357 Available at: <http://www.ncbi.nlm.nih.gov/pubmed/10662825>.
- 648 Lee JS, Ho W-K, Lee S-H (2012) Actin-dependent rapid recruitment of reluctant synaptic vesicles into a  
649 fast-releasing vesicle pool. *Proc Natl Acad Sci U S A* 109:E765–E774 Available at:  
650 <http://www.pubmedcentral.nih.gov/articlerender.fcgi?artid=3323990&tool=pmcentrez&rendertype=abstract> [Accessed July 20, 2014].  
651
- 652 Lee JS, Ho W-K, Neher E, Lee S-H (2013) Superpriming of synaptic vesicles after their recruitment to the  
653 readily releasable pool. *Proc Natl Acad Sci U S A* 110:15079–15084 Available at:  
654 <http://www.ncbi.nlm.nih.gov/pubmed/23980146> [Accessed December 3, 2013].
- 655 Lipstein N, Sakaba T, Cooper BH, Lin K-H, Strenzke N, Ashery U, Rhee J-S, Taschenberger H, Neher E,  
656 Brose N (2013) Dynamic control of synaptic vesicle replenishment and short-term plasticity by  
657 Ca(2+)-calmodulin-Munc13-1 signaling. *Neuron* 79:82–96 Available at:  
658 <http://www.ncbi.nlm.nih.gov/pubmed/23770256> [Accessed December 6, 2013].
- 659 Lou X, Scheuss V, Schneggenburger R (2005) Allosteric modulation of the presynaptic Ca<sup>2+</sup> sensor for  
660 vesicle fusion. *Nature* 435:497–501.
- 661 Luo F, Bacaj T, Südhof TC (2015) Synaptotagmin-7 Is Essential for Ca<sup>2+</sup>-Triggered Delayed Asynchronous  
662 Release But Not for Ca<sup>2+</sup>-Dependent Vesicle Priming in Retinal Ribbon Synapses. *J Neurosci*  
663 35:11024–11033 Available at: <http://www.jneurosci.org/content/35/31/11024.abstract?etoc>.
- 664 Marcaggi P, Attwell D (2005) Endocannabinoid signaling depends on the spatial pattern of synapse  
665 activation. *Nat Neurosci* 8:776–781 Available at:  
666 <http://www.pubmedcentral.nih.gov/articlerender.fcgi?artid=2629534&tool=pmcentrez&rendertype=abstract>  
667 [Accessed November 22, 2013].

- 668 Miki T, Malagon G, Pulido C, Llano I, Neher E, Marty A (2016) Actin- and Myosin-Dependent Vesicle  
669 Loading of Presynaptic Docking Sites Prior to Exocytosis. *Neuron* 91:808–823 Available at:  
670 <http://linkinghub.elsevier.com/retrieve/pii/S0896627316304184>.
- 671 Millar AG, Zucker RS, Ellis-Davies GCR, Charlton MP, Atwood HL (2005) Calcium sensitivity of  
672 neurotransmitter release differs at phasic and tonic synapses. *J Neurosci* 25:3113–3125 Available  
673 at: <http://www.ncbi.nlm.nih.gov/pubmed/15788768> [Accessed August 21, 2014].
- 674 Moulder KL, Mennerick S (2005) Reluctant vesicles contribute to the total readily releasable pool in  
675 glutamatergic hippocampal neurons. *J Neurosci* 25:3842–3850 Available at:  
676 <http://www.ncbi.nlm.nih.gov/pubmed/15829636> [Accessed September 19, 2014].
- 677 Neher E (2015) Perspective Merits and Limitations of Vesicle Pool Models in View of Heterogeneous  
678 Populations of Synaptic Vesicles. *Neuron* 87:1131–1142 Available at:  
679 <http://dx.doi.org/10.1016/j.neuron.2015.08.038>.
- 680 Pan B, Zucker RS (2009) A General Model of Synaptic Transmission and Short-Term Plasticity. *Neuron*  
681 62:539–554 Available at: <http://dx.doi.org/10.1016/j.neuron.2009.03.025>.
- 682 Rancz E a, Ishikawa T, Duguid I, Chadderton P, Mahon S, Häusser M (2007) High-fidelity transmission of  
683 sensory information by single cerebellar mossy fibre boutons. *Nature* 450:1245–1248 Available at:  
684 <http://www.ncbi.nlm.nih.gov/pubmed/18097412> [Accessed November 26, 2013].
- 685 Regehr WG (2012) Short-term presynaptic plasticity. *Cold Spring Harb Perspect Biol* 4:a005702 Available  
686 at: <http://www.ncbi.nlm.nih.gov/pubmed/22751149> [Accessed December 3, 2013].
- 687 Ritzau-Jost A, Delvendahl I, Rings A, Byczkovicz N, Harada H, Shigemoto R, Hirrlinger J, Eilers J,  
688 Hallermann S (2014) Ultrafast action potentials mediate kilohertz signaling at a central synapse.  
689 *Neuron* 84:152–163 Available at:  
690 <http://www.sciencedirect.com/science/article/pii/S0896627314007375> [Accessed October 13,  
691 2014].
- 692 Rudolph S, Overstreet-Wadiche L, Wadiche JI (2011) Desynchronization of multivesicular release  
693 enhances Purkinje cell output. *Neuron* 70:991–1004 Available at:  
694 <http://www.pubmedcentral.nih.gov/articlerender.fcgi?artid=3148031&tool=pmcentrez&rendertype=abstract> [Accessed June 26, 2014].
- 696 Sakaba T (2006) Roles of the fast-releasing and the slowly releasing vesicles in synaptic transmission at  
697 the calyx of held. *J Neurosci* 26:5863–5871 Available at:  
698 <http://www.ncbi.nlm.nih.gov/pubmed/16738227> [Accessed November 23, 2013].
- 699 Sakaba T (2008) Two Ca<sup>2+</sup>-dependent steps controlling synaptic vesicle fusion and replenishment at the  
700 cerebellar basket cell terminal. *Neuron* 57:406–419 Available at:  
701 <http://www.ncbi.nlm.nih.gov/pubmed/18255033> [Accessed November 26, 2013].
- 702 Sakaba T, Neher E (2001) Preferential potentiation of fast-releasing synaptic vesicles by cAMP at the  
703 calyx of Held. *Proc Natl Acad Sci U S A* 98:331–336 Available at:  
704 <http://www.pubmedcentral.nih.gov/articlerender.fcgi?artid=14590&tool=pmcentrez&rendertype=abstract>.  
705

- 706 Sätzler K, Söhl LF, Bollmann JH, Borst JGG, Frotscher M, Sakmann B, Lübke JHR (2002) Three-dimensional  
707 reconstruction of a calyx of Held and its postsynaptic principal neuron in the medial nucleus of the  
708 trapezoid body. *J Neurosci* 22:10567–10579 Available at:  
709 <http://www.ncbi.nlm.nih.gov/pubmed/12486149> [Accessed December 4, 2013].
- 710 Saviane C, Silver RA (2006) Fast vesicle reloading and a large pool sustain high bandwidth transmission at  
711 a central synapse. *Nature* 439:983–987 Available at:  
712 <http://www.ncbi.nlm.nih.gov/pubmed/16496000> [Accessed November 26, 2013].
- 713 Schmidt H, Brachtendorf S, Arendt O, Hallermann S, Ishiyama S, Bornschein G, Gall D, Schiffmann SN,  
714 Heckmann M, Eilers J (2013) Nanodomain coupling at an excitatory cortical synapse. *Curr Biol*  
715 23:244–249 Available at: <http://www.ncbi.nlm.nih.gov/pubmed/23273895> [Accessed August 28,  
716 2015].
- 717 Schneggenburger R, Han Y, Kochubey O (2012) Ca<sup>2+</sup> channels and transmitter release at the active zone.  
718 *Cell Calcium* 52:199–207 Available at: <http://dx.doi.org/10.1016/j.ceca.2012.04.011>.
- 719 Schneggenburger R, Meyer AC, Neher E (1999) Released fraction and total size of a pool of immediately  
720 available transmitter quanta at a calyx synapse. *Neuron* 23:399–409 Available at:  
721 <http://linkinghub.elsevier.com/retrieve/pii/S0896627300807898> [Accessed May 26, 2015].
- 722 Silverman-Gavrila LB, Orth PMR, Charlton MP (2005) Phosphorylation-dependent low-frequency  
723 depression at phasic synapses of a crayfish motoneuron. *J Neurosci* 25:3168–3180 Available at:  
724 <http://www.ncbi.nlm.nih.gov/pubmed/15788774> [Accessed December 6, 2013].
- 725 Sims RE, Hartell N a (2005) Differences in transmission properties and susceptibility to long-term  
726 depression reveal functional specialization of ascending axon and parallel fiber synapses to Purkinje  
727 cells. *J Neurosci* 25:3246–3257 Available at: <http://www.ncbi.nlm.nih.gov/pubmed/15788782>  
728 [Accessed March 27, 2014].
- 729 Thach WT, Goodkin HP, Keating JG (1992) The cerebellum and the adaptive coordination of movement.  
730 *Annu Rev Neurosci* 15:403–442 Available at: <http://www.ncbi.nlm.nih.gov/pubmed/1575449>  
731 [Accessed August 19, 2014].
- 732 Valera AM, Doussau F, Poulain B, Barbour B, Isope P (2012) Adaptation of granule cell to Purkinje cell  
733 synapses to high-frequency transmission. *J Neurosci* 32:3267–3280 Available at:  
734 <http://www.ncbi.nlm.nih.gov/pubmed/22378898> [Accessed April 23, 2015].
- 735 Van Kan PL, Gibson a R, Houk JC (1993) Movement-related inputs to intermediate cerebellum of the  
736 monkey. *J Neurophysiol* 69:74–94 Available at: <http://www.ncbi.nlm.nih.gov/pubmed/8433135>.
- 737 Wen H, Linhoff MW, McGinley MJ, Li G, Corson GM, Mandel G, Brehm P (2010) Distinct roles for two  
738 synaptotagmin isoforms in synchronous and asynchronous transmitter release at zebrafish  
739 neuromuscular junction. *Proc Natl Acad Sci U S A* 107:13906–13911 Available at:  
740 <http://eutils.ncbi.nlm.nih.gov/entrez/eutils/elink.fcgi?dbfrom=pubmed&id=20643933&retmode=ref&cmd=prlinks\npapers3://publication/doi/10.1073/pnas.1008598107>.  
741
- 742 Wölfel M, Lou X, Schneggenburger R (2007) A mechanism intrinsic to the vesicle fusion machinery  
743 determines fast and slow transmitter release at a large CNS synapse. *J Neurosci* 27:3198–3210  
744 Available at: <http://www.ncbi.nlm.nih.gov/pubmed/17376981> [Accessed November 15, 2013].

- 745 Xu J, Mashimo T, S?dhof TC (2007) Synaptotagmin-1, -2, and -9: Ca<sup>2+</sup> Sensors for Fast Release that  
746 Specify Distinct Presynaptic Properties in Subsets of Neurons. *Neuron* 54:567–581.
- 747 Xu J, Wu L-G (2005) The decrease in the presynaptic calcium current is a major cause of short-term  
748 depression at a calyx-type synapse. *Neuron* 46:633–645 Available at:  
749 <http://www.ncbi.nlm.nih.gov/pubmed/15944131> [Accessed December 3, 2013].
- 750 Xu-Friedman M a, Harris KM, Regehr WG (2001) Three-dimensional comparison of ultrastructural  
751 characteristics at depressing and facilitating synapses onto cerebellar Purkinje cells. *J Neurosci*  
752 21:6666–6672 Available at: <http://www.ncbi.nlm.nih.gov/pubmed/11517256>.
- 753 Zhao S, Ting JT, Atallah HE, Qiu L, Tan J, Gloss B, Augustine GJ, Deisseroth K, Luo M, Graybiel AM, Feng G  
754 (2011) Cell type-specific channelrhodopsin-2 transgenic mice for optogenetic dissection of neural  
755 circuitry function. *Nat Methods* 8:745–752 Available at:  
756 <http://www.nature.com/doi/10.1038/nmeth.1668> [Accessed November 7, 2013].
- 757

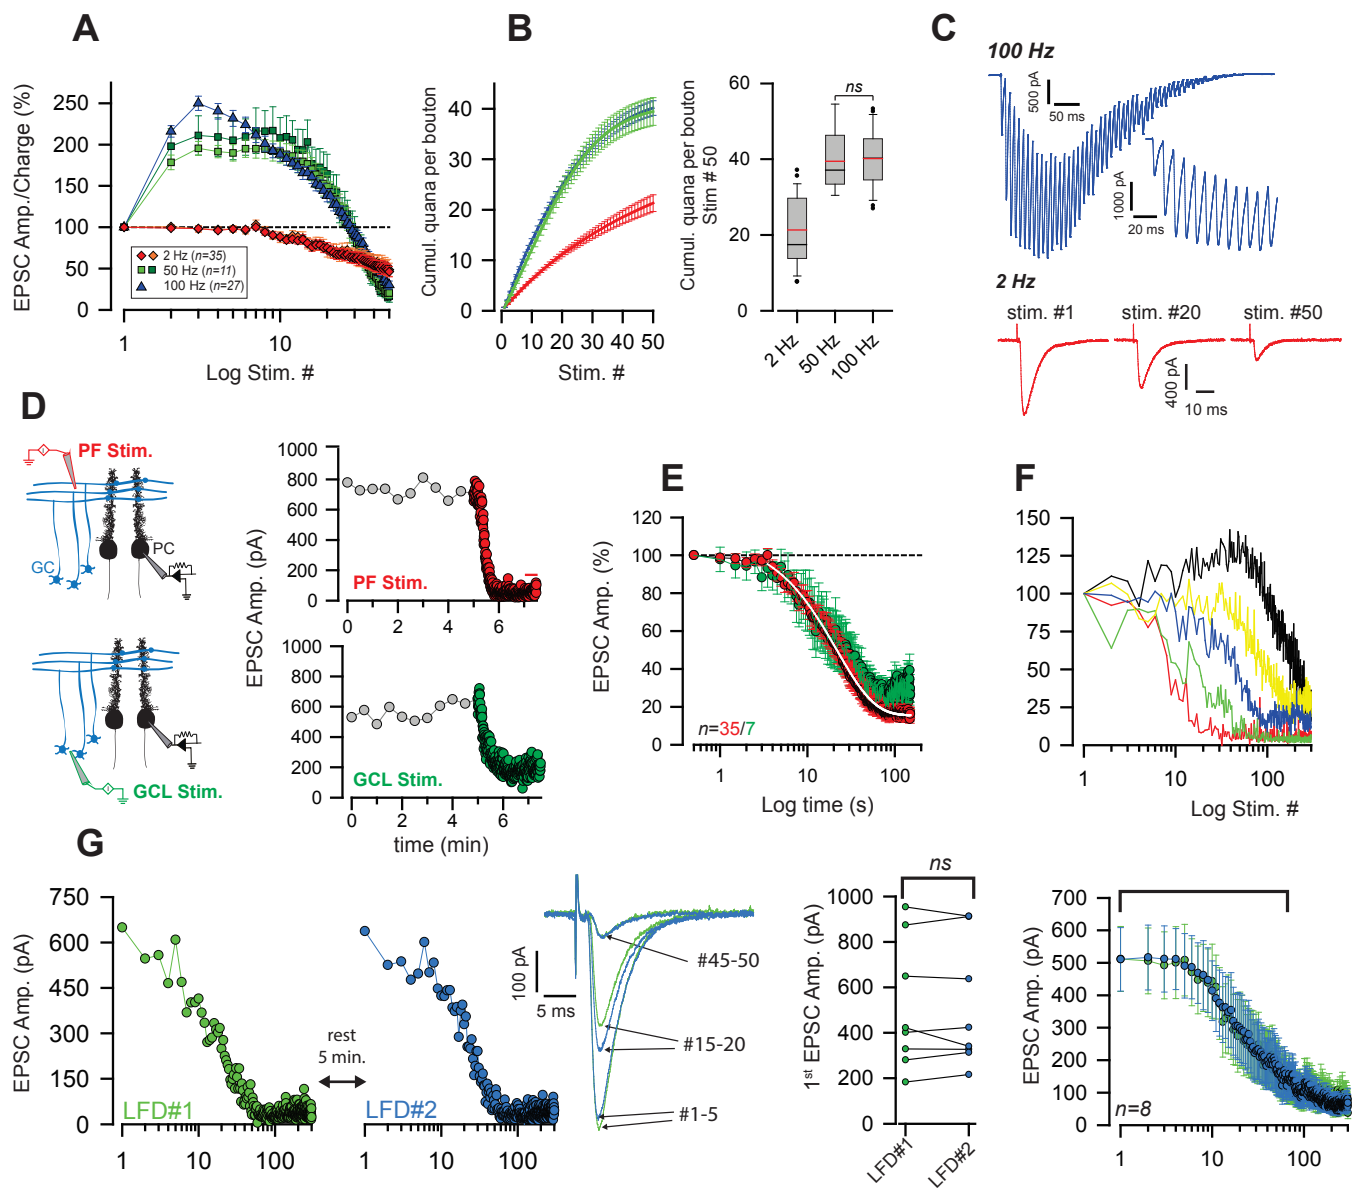

Doussau et al, Fig. 1



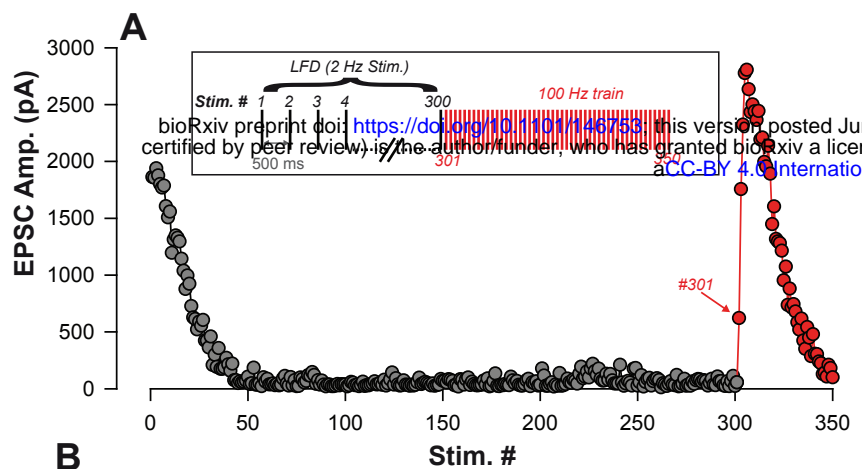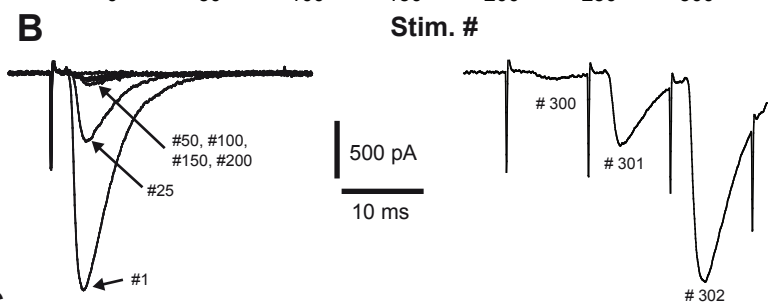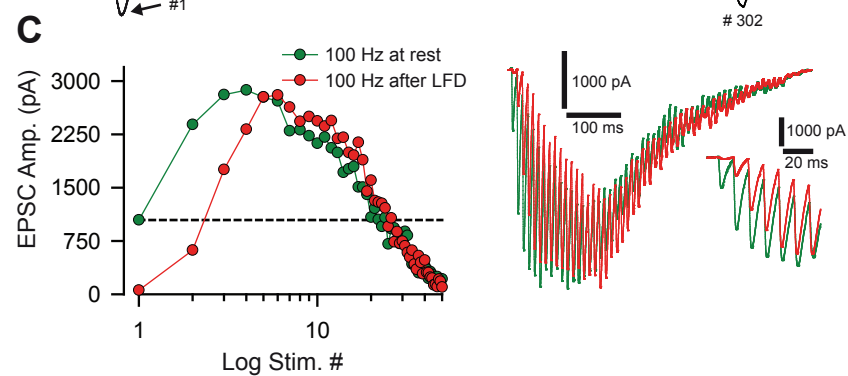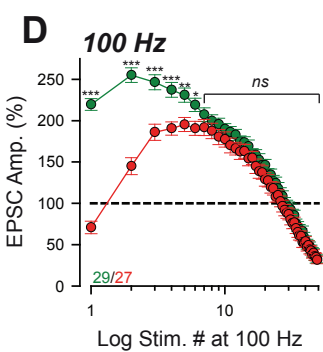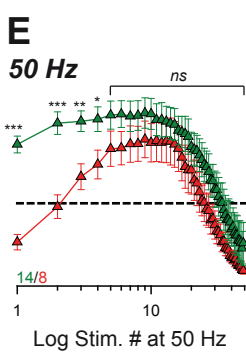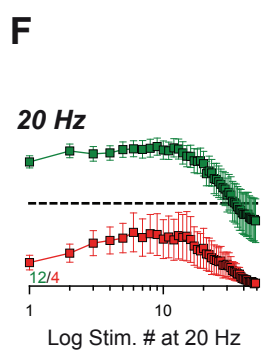

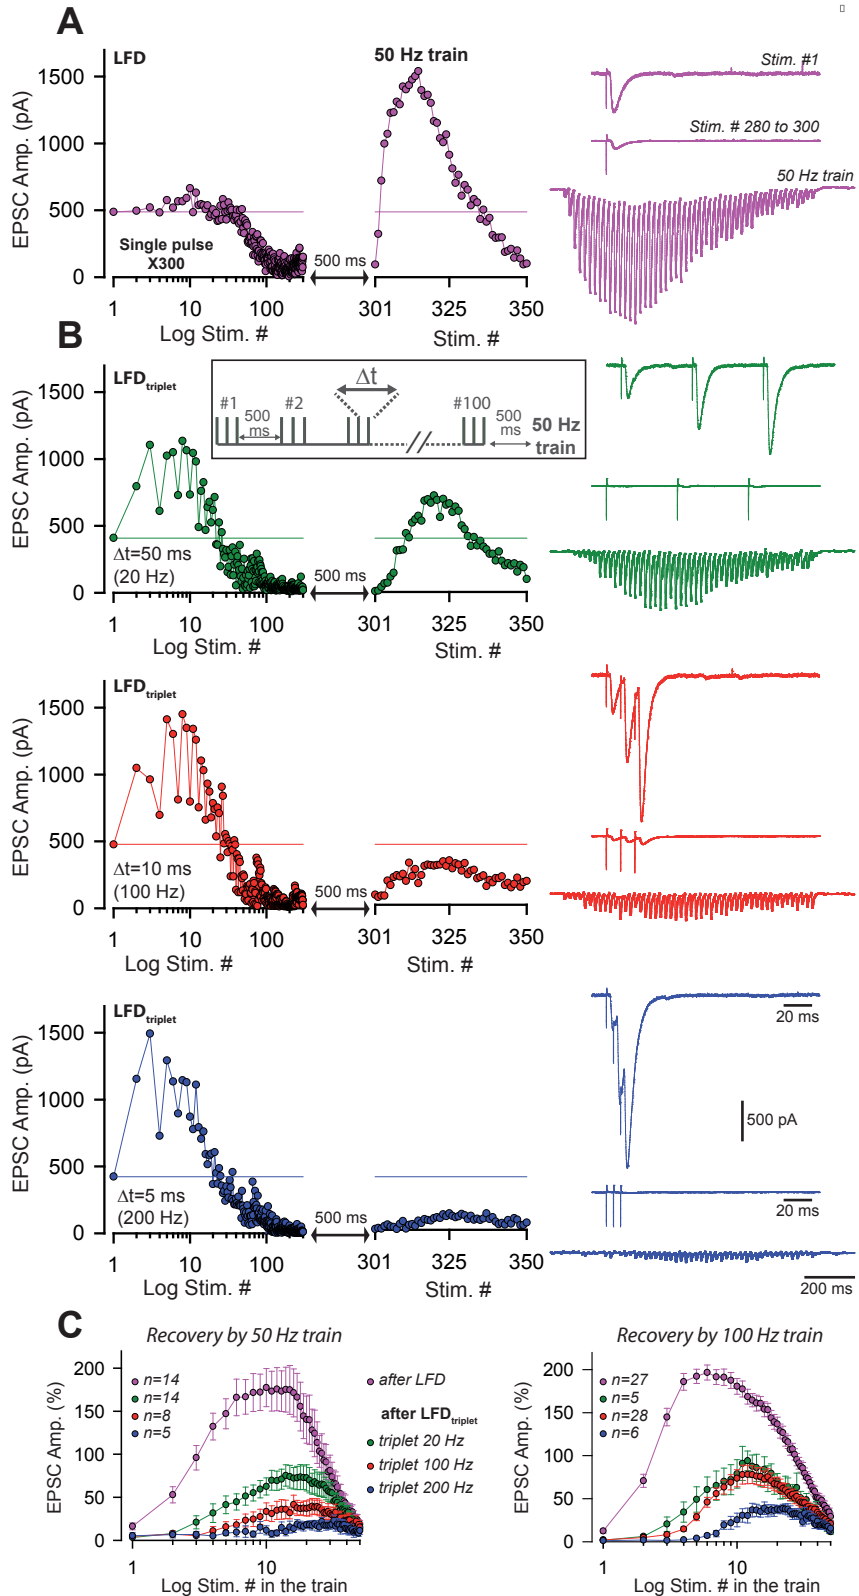

Doussau *et al*, Figure 3

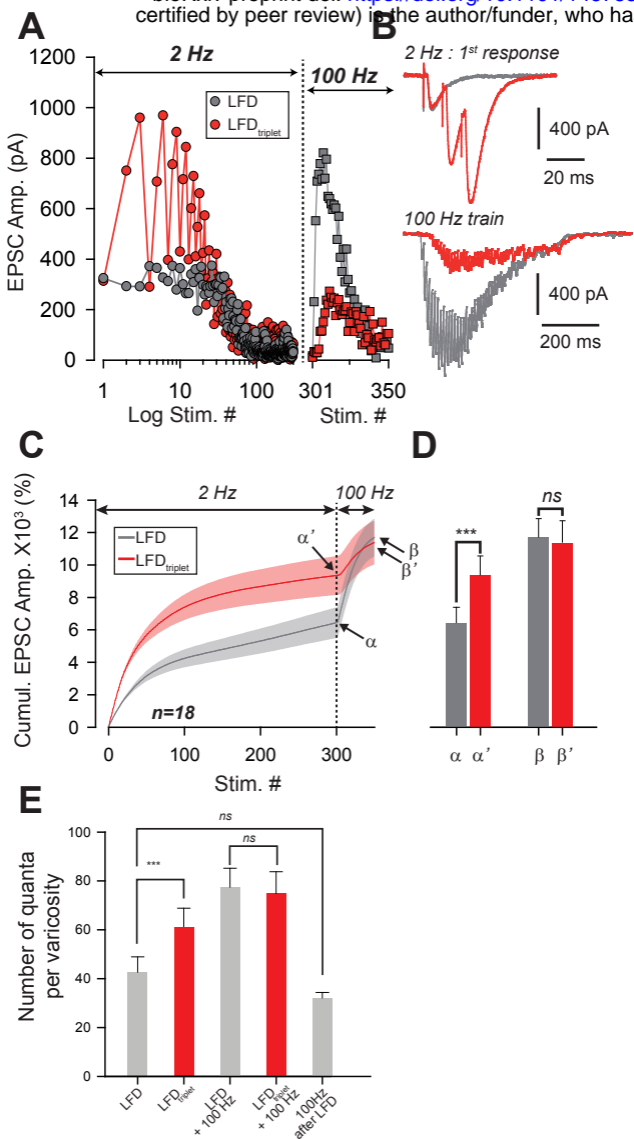

Doussau et al, Fig. 4

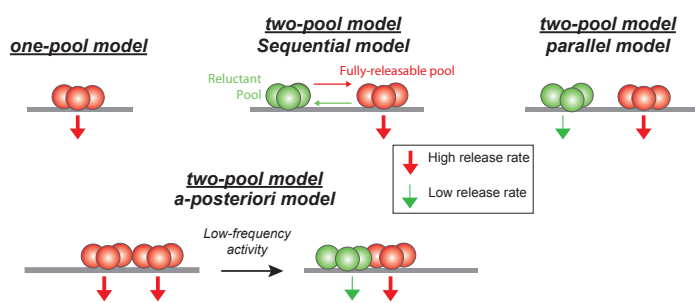

Doussau et al, Fig. 5

## A Sequential mode (two-pool model)

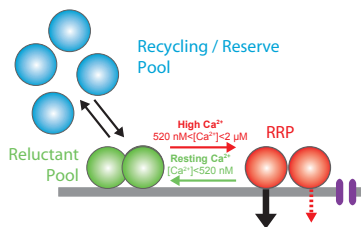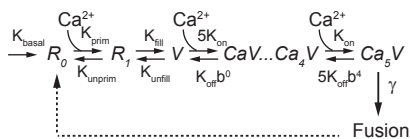

## B Local Ca<sup>2+</sup> at release sensor

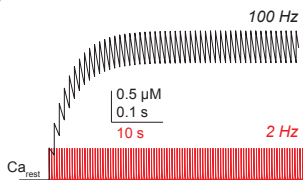

## C

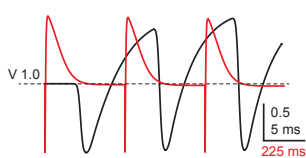

## D

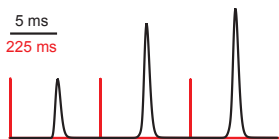

## E

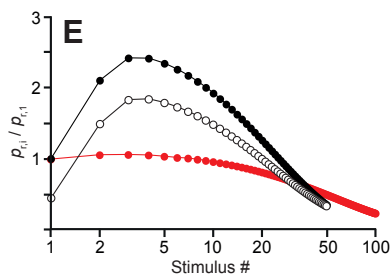

## F One-pool model

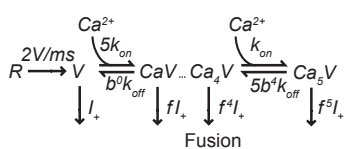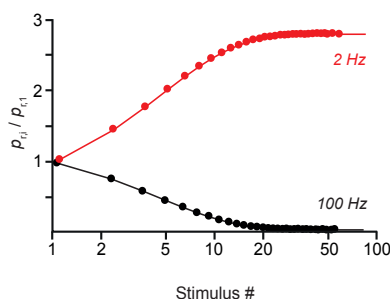

## G Parallel mode (two-pool model)

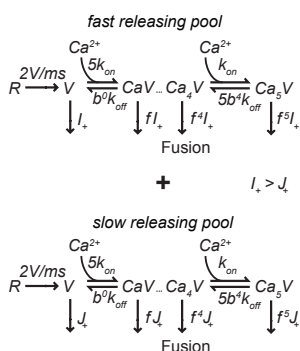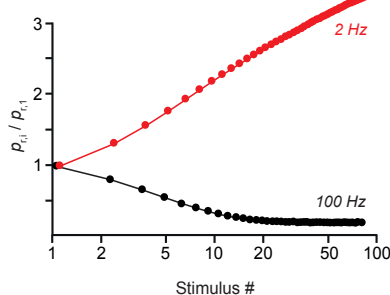

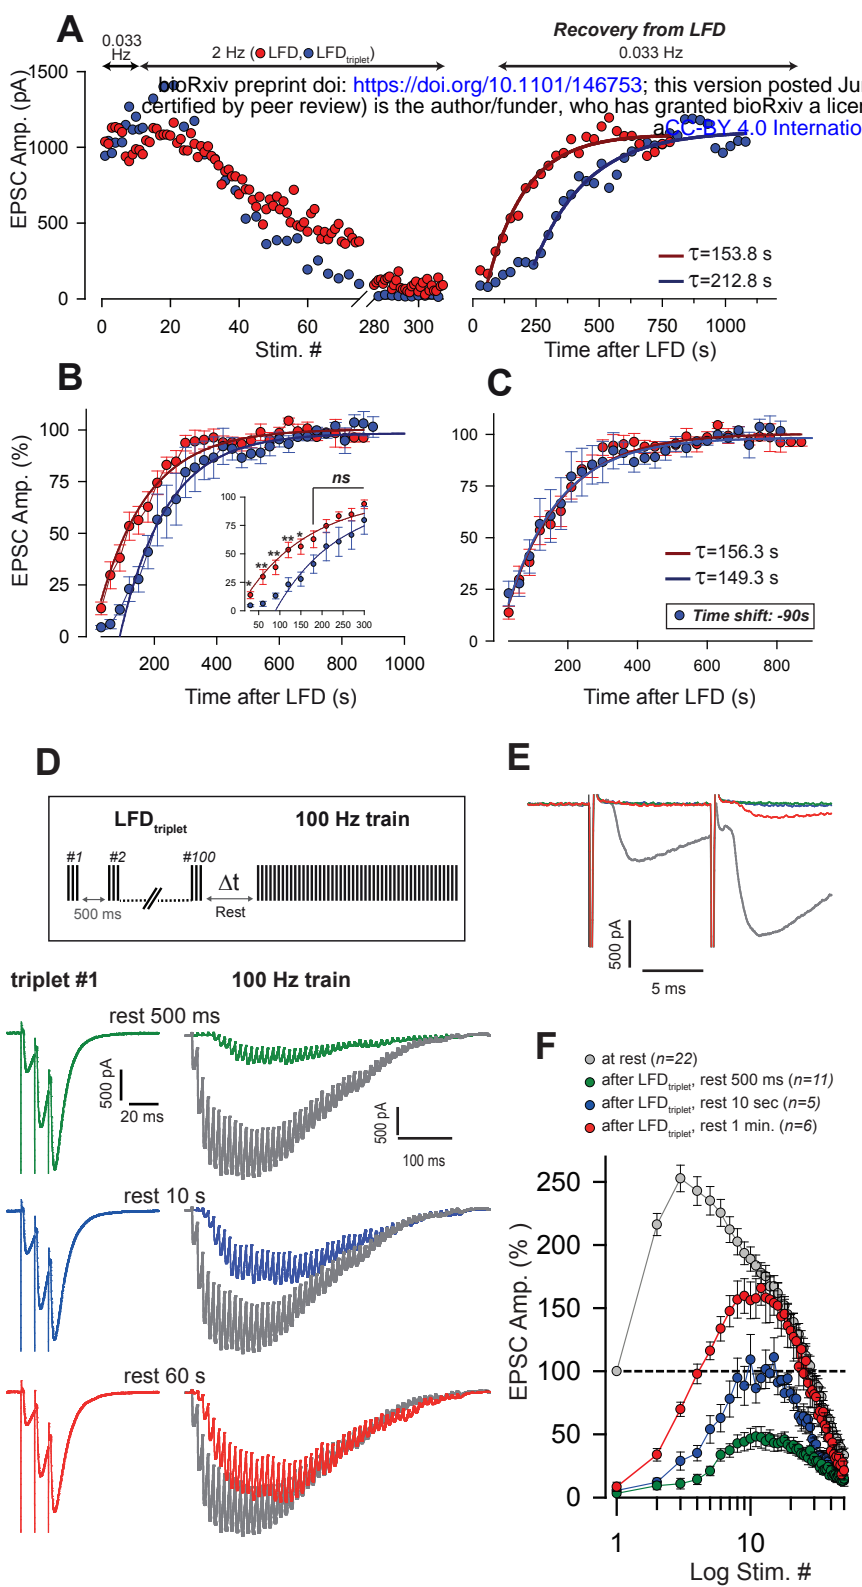

Doussau et al, Fig. 7

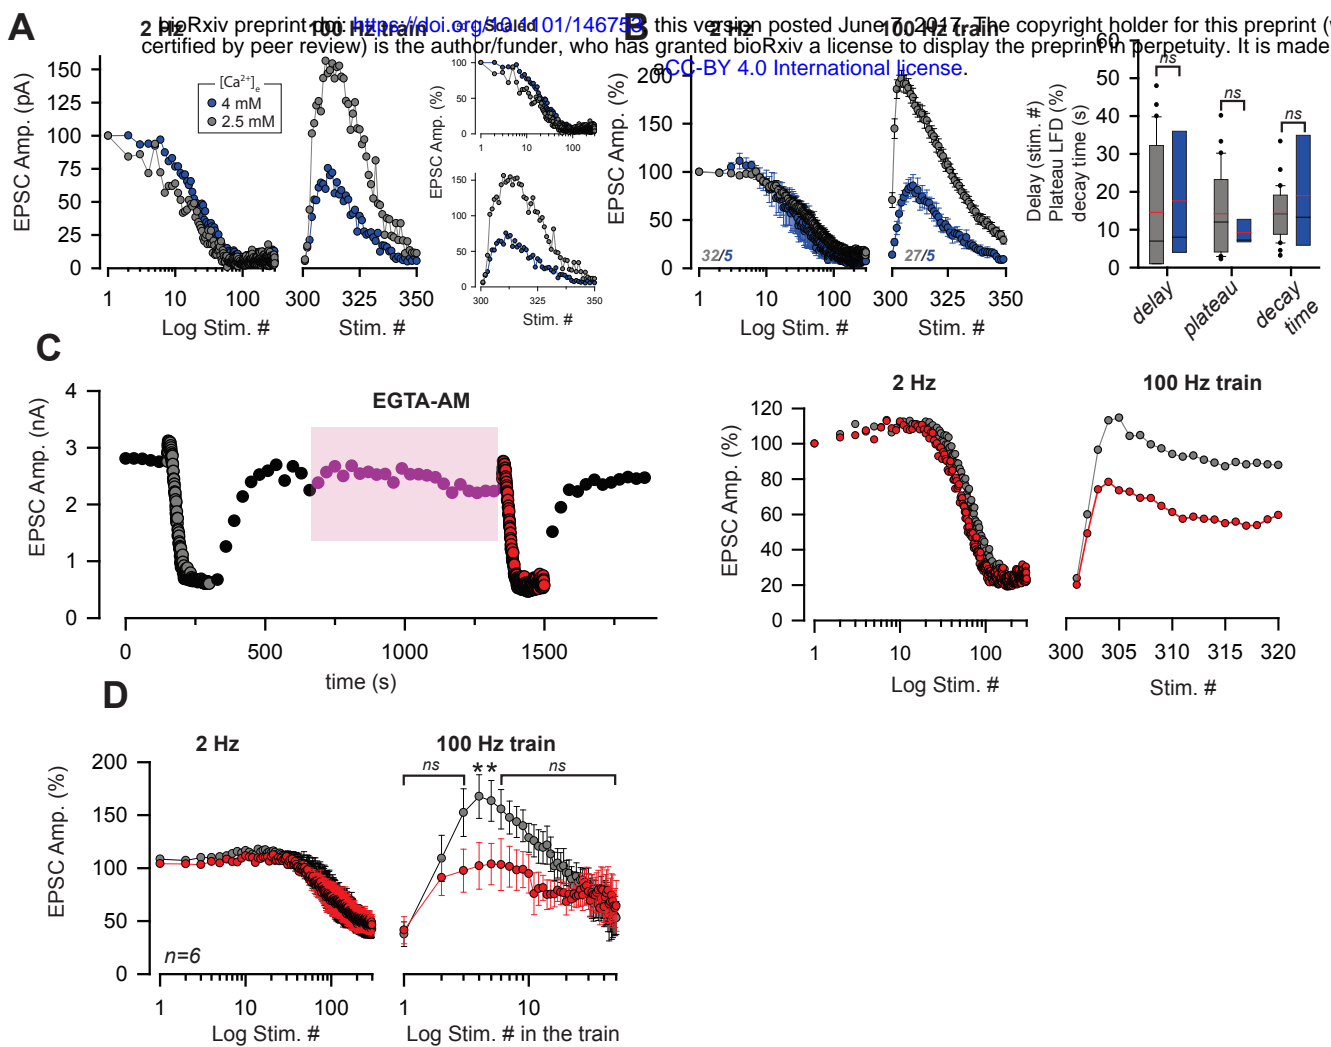

Doussau et al, Fig. 8

## LEGENDS

**Figure 1.** Low-frequency depression at GC-PC synapses. **A**, Averaged EPSC amplitude and charge versus stimulus number during train of stimuli at 2, 50 and 100 Hz. At 50 Hz EPSC amplitude and EPSC charge are represented with light green squares and dark green squares respectively. At 2 Hz, EPSC amplitudes and EPSC charge are represented with red diamonds and orange diamonds respectively. Due to the overlapping of EPSC, charge values were not measured at 100 Hz. Note the absence of facilitation at 2 Hz. **B**, Corresponding cumulative plots of the number of quanta release per bouton (left). The cumulative number of quanta released at 50 Hz and 100 Hz at the 50<sup>th</sup> stimulus were statistically identical (*t*-test,  $p=0.82$ ). Mean and median lanes are respectively represented in red and black (right) **C**, Examples of EPSCs during train at 100 Hz and 2 Hz. *Inset*: The first EPSCs observed during 100 Hz train application. The stimulus artifacts have been subtracted for the 100 Hz train. **D**, Time course of EPSC amplitude following stimulation of PF (upper panels) or GC somata (lower panels) at 0.033 Hz (gray points) and 2Hz (red or green points) **E**, Mean normalized EPSC amplitude during sustained 2 Hz stimulation of PF (red points) or GC somata (green points). Note the delay before the actual induction of depression. The depression was fitted by a monoexponential function ( $\tau = 21.7$  s, white lane). **F**, Selected time course of LFD recorded in 5 PCs showing differences in the onset and the plateau of depression **G**, Left graph: Time courses of two successive LFDs elicited in the same cell. The second LFD (LFD#2, blue points) was elicited after a resting period of 5 minutes after the first had ended (LFD#1, green points). Traces correspond to averaged EPSCs recorded during LFD#1 and LFD#2 (green and blue traces, respectively) at the indicated stimulus numbers. Middle graph: Values of EPSC amplitude recorded at the 1<sup>st</sup> stimuli of LFD#1 (green points) and LFD#2 (blue points). The lack of statistical difference



( $p=0.94$ , paired  $t$ -test,  $n=8$ ) in EPSC amplitudes between LFD#1 and LFD#2 reflects a full recovery from depression after the resting period that followed LFD#1. Right graph: Superimposition of mean EPSC amplitudes recorded during LFD#1 (green points) and LFD#2 (blue points). The similarity between LFD#1 and LFD#2 was tested using a paired  $t$ -test. The values were statistically different for the entire experiment ( $p<0.001$ ,  $n=8$ ) but the 60 firsts response were statistically identical (paired  $t$ -test,  $p=0.08$ ,  $n=8$ ).

**Figure 2.** Ultrafast recovery from LFD by high-frequency trains. **A**, Typical experiment illustrating EPSC amplitude during LFD (gray points, stimulation at 2 Hz) and the fast recovery from LFD via high-frequency trains (red points, stimulation 100 Hz). *Inset*: protocol of stimulation. Stimulus #1 denotes the beginning of 2 Hz stimulation. **B**, Superimposed EPSC recorded during 2 Hz stimulation (left) and during the following 100 Hz train (right) at the indicated stimulus number. Note the ultrafast recovery from depression at 100 Hz (stimulus # 301). **C**, Left, Example of time course of EPSC amplitudes plotted against stimulus number during 100 Hz train applied in the control condition (green), or starting 10 ms after 300 stimuli at 2 Hz. EPSCs were recorded in the same PC. The dashed line corresponds to the baseline amplitude (mean value of EPSC at 0.033 Hz). Note the superposition of EPSC amplitudes after the 4<sup>th</sup> stimuli at 100 Hz. Right, Corresponding traces recorded during these 100 Hz trains. *Inset*: The first EPSCs observed during train application. **D**, Mean values of normalized EPSC amplitude elicited by trains of stimulation at 100 Hz, 50 Hz and 20 Hz at baseline (0.033 Hz, green) or after LFD induction (2 Hz, red). EPSC amplitudes were not significantly different after the 7<sup>th</sup> stimuli for 100 Hz trains (MWRST,  $p=0.181$ ,  $n=27$ ) and after the 5<sup>th</sup> stimuli for 50 Hz trains ( $t$ -test,  $p=0.137$ ,  $n=13$ ). Numbers at the bottom of the graphs indicate the number of cells for each condition.

**Figure 3.** Short-term facilitation during triple-pulse stimulation at high frequency impedes recovery from LFD via high-frequency trains. **A**, LFD induced by a single pulse followed by a 50 Hz train **B**, LFDs induced by a triple pulse at different frequencies ( $LFD_{\text{triplet}}$ , see inset for protocol), namely 20 Hz (green), 100 Hz (red) and 200 Hz (blue) followed by a 50 Hz train. For each condition, the upper traces correspond to EPSCs recorded at stimulus #1 (purple trace) or at triple pulse #1 (other traces) of the 2 Hz stimulation. The middle traces correspond to averaged EPSCs recorded during the LFD plateau (stimuli #280 to #300 for the purple trace and triple-pulses #80 to #100 for other traces). The bottom traces from which stimulus artifacts were subtracted correspond to EPSCs recorded during the 50 Hz train applied 500 ms after the 2 Hz stimulation ended. All data and traces were obtained in the same PC, and LFDs were elicited after a resting period of 5 minutes after the end of each protocol. **C**, Mean values of normalized EPSC amplitude plotted against stimulus number and recorded during 50 Hz train (left) and 100 Hz train applied 500 ms after LFD induction (300 single stimuli at 2 Hz or 100 triple pulses at 2 Hz). Color code is identical to that used in *A*, *B*.

**Figure 4.** Recruitment of reluctant vesicles by high-frequency trains underpins recovery from LFD. **A**, Superimposition of the EPSC amplitude time courses elicited during LFD induction (gray circles) or  $LFD_{\text{triplet}}$  (triplet stimulation at 100 Hz, red circles) in the same PC, and during the recovery from LFD via application of a 100 Hz train (gray squares for a 100 Hz train applied 500 ms after LFD, and red squares for a 100 Hz train applied 500 ms after  $LFD_{\text{triplet}}$ ). **B**, The upper traces correspond to the superimposition of the first EPSCs recorded at stimulus #1 for LFD (gray trace) and  $LFD_{\text{triplet}}$  (red trace). The lower traces correspond to EPSCs recorded during the 100 Hz trains applied 500 ms after LFD (gray trace) or 500 ms after  $LFD_{\text{triplet}}$ . **C**, Mean values of the cumulative EPSC amplitudes during LFD and  $LFD_{\text{triplet}}$  induction protocol followed by a recovery

train at 100 Hz (n=18 cells). LFD and LFD<sub>triplet</sub> were elicited successively in the same PCs. The dashed line indicates the beginning of the 100 Hz trains.  $\alpha$  and  $\alpha'$  correspond to the cumulative value at the end of LFD protocols,  $\beta$  and  $\beta'$  are values obtained following the recovery trains. **D**, Mean values of  $\alpha$ ,  $\alpha'$ ,  $\beta$  and  $\beta'$  (same y axis as in C). **E**, Estimation of the number of quanta released per varicosity at GC-PC synapse during LFD, LFD<sub>triplet</sub> and during the recovery via 100 Hz train (same set of experiments than in D). For the panels D and E, data were compared by using paired *t*-test.

**Figure 5.** Schematics of the various models accounting for exocytosis at GC-PC synapses. Based on hypothesis proposed in other synapses, exocytosis could be achieved through an intrinsically homogeneous pool of release-ready SVs (one-pool model) or through a two-pool model with alternative stages of transition between the two pools. For the two-pool model, releasable SVs are separated in a fully-releasable pool (red SVs) or a reluctant one (green SVs).

**Figure 6.** Models of facilitation and LFD. **A**, Scheme illustrating the sequential model of Ca<sup>2+</sup> binding and release at the PF-PC synapse (left). Voltage-dependent calcium channels are represented in purple. In the corresponding mathematical model (right) the recycling / reserve pool is contained only implicitly by restoration of the reluctant pool ( $R_0+R_1$ ) from fused SVs (dashed arrow) and via a basal refilling rate ( $k_{basal}$ ). Therefore, this model is referred to as sequential “two-pool” model. During high-frequency activation the residual Ca<sup>2+</sup> increases, resulting in recruitment of SVs from the reluctant pool into the RRP, i.e. a temporal increase in the RRP that causes substantial facilitation (red arrow). The residual Ca<sup>2+</sup> generates an additional moderate, short-lasting facilitation due to slow unbinding from the release sensor (dashed red arrow). During low frequency activation at 2 Hz, the residual Ca<sup>2+</sup> fully drops back to resting level between stimuli and SVs recruited to the RRP return to the reluctant pool

(green arrow). **B**, Simulated time courses and amplitudes of residual  $\text{Ca}^{2+}$  during high- (100 Hz, black) or low-frequency (2 Hz, red) activation starting from a resting  $\text{Ca}^{2+}$  ( $\text{Ca}_{\text{rest}}$ ) level of 50 nM. **C**, Fraction of  $\text{Ca}^{2+}$  unoccupied SVs in the RRP ( $V$ ) of the release sensor during the initial three activations of a 100 Hz (black) or 2 Hz (red) activation train. Note that during the first three activations at low frequency the RRP relaxes to its initial ( $V=1$ , i.e. 100%) from a transient overfilling ( $V>1$ ) prior to the next pulse while it continues to increase in size during high-frequency activation due to the build-up in residual  $\text{Ca}^{2+}$  and continuing recruitment of reluctant vesicles (cf. **B**). **D**, Transmitter release rates during three activations at high (black) or low frequencies (red), normalized to the first release process. **E**, Paired pulse ratios (PPRs) calculated as the ratio of release probabilities in the  $i$ -th ( $p_{r,i}$ ) and the first pulse ( $p_{r,1}$ ) during 100 Hz (filled black) or 2 Hz (red) activations plotted against the logarithmically scaled stimulus number. Open circles show PPRs during 100 Hz activations started in a previously depressed model. **F**, (left) One-pool model of  $\text{Ca}^{2+}$  binding and release according to Wölfel et al (2007) consisting of the “allosteric” sensor model (Lou et al., 2005) supplemented with a reloading step of 2 SVs/ms. In contrast to our experimental findings, this model generates low-frequency facilitation and high-frequency depression (right). **G**, (left) as in **F** but for two parallel, non-interacting pools of SVs differing in their release rate constants thereby generating a “fast releasing pool of SV” (release rate  $I_+$  as in **F**) and a “slowly releasing pool of SV” (release rate  $J_+ < I_+$  as in **F**, Wölfel et al., 2007). Both models are restored via  $\text{Ca}^{2+}$  independent reloading steps of 2 SVs/ms. Note that similar to the model in **F**, this simulation generates a high-frequency depression and a low-frequency facilitation.

**Figure 7.** Kinetics of recovery from LFD **A**, Left, superimposition of the time course of LFD and  $\text{LFD}_{\text{triplet}}$  (triplet stimulation at 200 Hz) elicited successively in the

same cell after at least 10 successive stimuli at 0.033 Hz. Right, time course for recovery from depression probed 30 s after the end of both LFD and LFD<sub>triplet</sub> by a 0.033 Hz stimulation. For clarity, EPSC amplitudes were plotted against stimulus number for the left graph and against time for the right graph. The thick red and blue lines on the right graph represent the monoexponential fit of the recovery. Data could be fitted from the first EPSC recorded 30 s after the end of LFD, whereas the recovery after LFD<sub>triplet</sub>, could only be satisfactorily fitted after 7 stimuli at 0.033 Hz. **B**, Superimposition of the EPSC peak amplitude mean values plotted against time and recorded during a 0.033 Hz stimulation protocol applied 30 s after LFD (red points,  $n=8$ ) or after LFD<sub>triplet</sub> (triplet stimulation at 200 Hz, blue points,  $n=6$ ). EPSC peak amplitudes were normalized to the mean value of EPSCs recorded during the plateau at 0.033 Hz. The thick red and blue lines on the right-hand graph represent the monoexponential fits. **C**, same values as in **B**, with the difference that the time axis was shifted by 90 sec for experimental values obtained during the recovery train applied after LFD<sub>triplet</sub> (blue points). **D**, Recovery from LFD<sub>triplet</sub> probed by 100 Hz train at the end of the LFD induction period, as indicated by the stimulation paradigm. Left, EPSC traces recorded during the 1<sup>st</sup> triplet stimulation at 2 Hz. Right, EPSC traces recorded during 100 Hz trains applied 500 ms, 10 s or 1 min. after LFD induction ended. Traces are superimposed with EPSCs recorded during a 100 Hz train applied in control conditions (gray traces). **E**, Superimposition of the first responses to the trains recorded in **D**. **F**, Mean values of EPSC amplitudes recorded during 100 Hz trains applied 500 ms, 10 s or 1 min. after the 2 Hz stimulation period ended.

**Figure 8.** The reluctant pool can be recruited by increasing  $p_r$ . **A**, Superimposition of the EPSC amplitude time courses, plotted against the stimulus number obtained in the same PC during LFD (left panels) and during the recovery from LFD (right panels) by

a 100 Hz train before and after an increase in  $[Ca^{2+}]_e$  from 2.5 mM to 4 mM. The inset shows the same experiment with normalized EPSC amplitude. **B**, Mean value of EPSC amplitude during LFD (left panel) and during the recovery via a 100 Hz train (middle panel) in presence of 2.5 mM (same set of data than in Fig. 1B, 3D) and 4 mM  $[Ca^{2+}]_e$ . Numbers at the bottom of the graphs indicate the number of cells for each condition. Right panel, the values of the delay (MWRST,  $p=0.60$ ), plateau of LFD (MWRST,  $p=0.69$ ) and decay time (MWRST,  $p=0.87$ ) were statistically identical in low (2.5 mM, gray bars) and high  $Ca^{2+}$  (4 mM, blue bars) conditions. Black and red bars correspond to median and mean values respectively **C**, Left panel, typical experiment showing the time course of EPSC amplitude before and after the application of 10  $\mu$ M EGTA-AM. Black points correspond to EPSCs recorded during 0.033Hz stimulation, gray and red points during 2 Hz stimulations and purple points during the application of 10  $\mu$ M EGTA-AM at 0.033 Hz. Right panel, superimposition of normalized EPSC amplitudes from the same experiment during LFD and during the recovery via a 100 Hz train. **D**, Left panel, values of EPSC amplitude before (gray points) and after (red points) application of EGTA-AM are statistically identical (paired t-test,  $p=0.61$ ,  $n=9$ ) at any stimulus number during LFD. At the opposite, early responses were slightly reduced after application of EGTA-AM during recovery by 100 Hz train ( $p=0.031$  at stimulus #5 and stimulus #6, signed rank test,  $n=6$ ) (right panel).
